# Supplementary material for: Active generation of nanoholes in DNA origami scaffolds for programmed catalysis in nanocavities
Source: Springer Nature journal article supplement (doi:10.1038/s41467-019-12933-9), 2019-10-31
Supplement: 41467_2019_12933_MOESM1_ESM.pdf [file 41467_2019_12933_MOESM1_ESM.pdf]

Supplementary Information

**Active generation of nanoholes in DNA origami scaffolds for programmed  
catalysis in nanocavities**

Wang et al.

This file includes:

Supplementary Figures 1 to 30

Supplementary Tables 1 to 24

Supplementary References

## I. Supplementary Figures and Tables

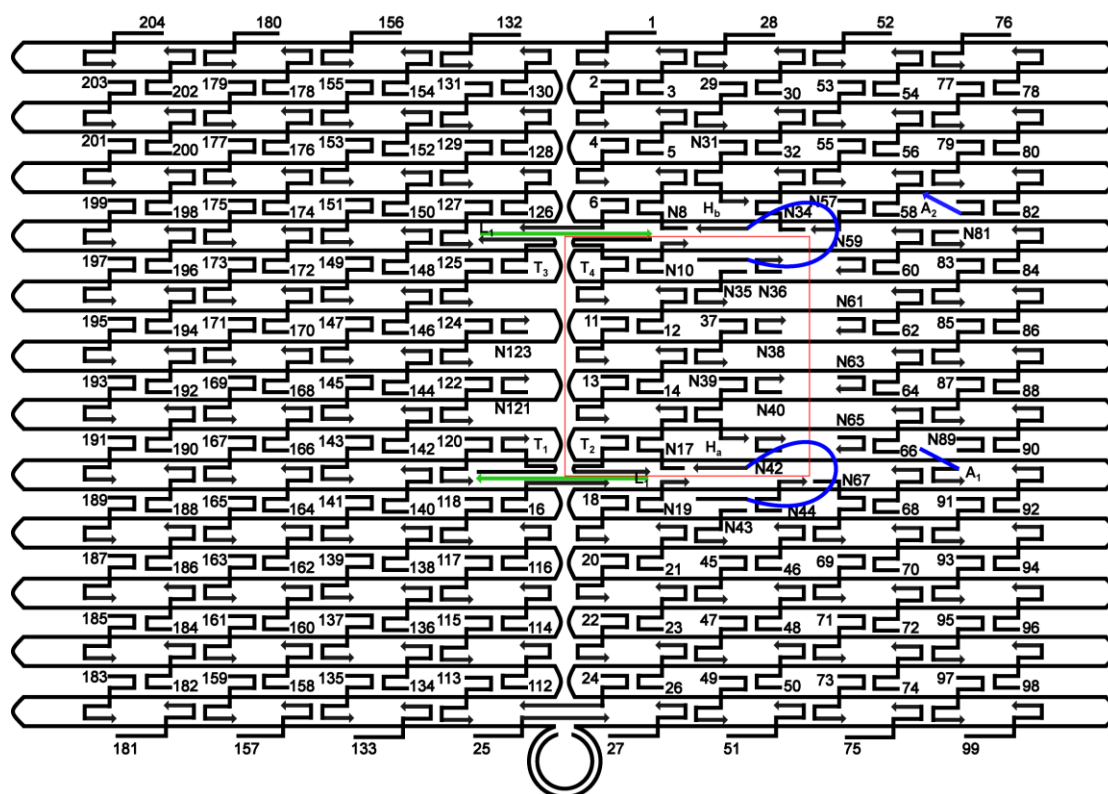

**Supplementary Figure 1. Schematic of the designed origami tile N.** The linker strand  $L_1$  shows in green, the handles ( $H_a$ ,  $H_b$ ) are blue loops and the anchoring tethers ( $A_1$ ,  $A_2$ ) are short blue lines. The red square shows the area of the designed “window” in the origami tile N.

The designed “window” is a small inner part of the origami tile that is linked to the origami scaffold through the M13 strand on its right side<sup>1</sup>. The linker of M13 strand on the right side of the “window” is working as hinges for its opening process. The left side of the “window” is locked to the origami scaffold using two linker strands  $L_1$  (green). One of the linkers hybridizes with the strand extending from the staple strand  $T_1$  on the origami tile scaffold and the strand extending from the staple strand  $T_2$  on the left side of the designed “window”. Similarly, the other one interacts with  $T_3$  and  $T_4$ . The linker strands  $L_1$  contain the sequences of the substrate of the  $Zn^{2+}$ -ion-dependent DNzyme and can be cleaved by the DNzyme. The top and bottom sides of the designed “window” have no interaction with the origami scaffold except the handles ( $H_a$  and  $H_b$ , blue loop). One end of the handle is linked to the staple strand of the origami tile scaffold and the other end of the handle is linked to the staple of the “window”. Two anchoring footholds ( $A_1$  and  $A_2$ ) are extending from the staple strands on the right side of the origami tile scaffold. The handles can facilitate the opening of the “unlocked window” through their hybridization with the helper strands that can bind to the anchoring tethers (in the form of  $H_a/H_1/A_1$  and  $H_b/H_2/A_2$ ). The staples on the left edge and right edge are removed to avoid the aggregation of the origami tiles<sup>1</sup>.

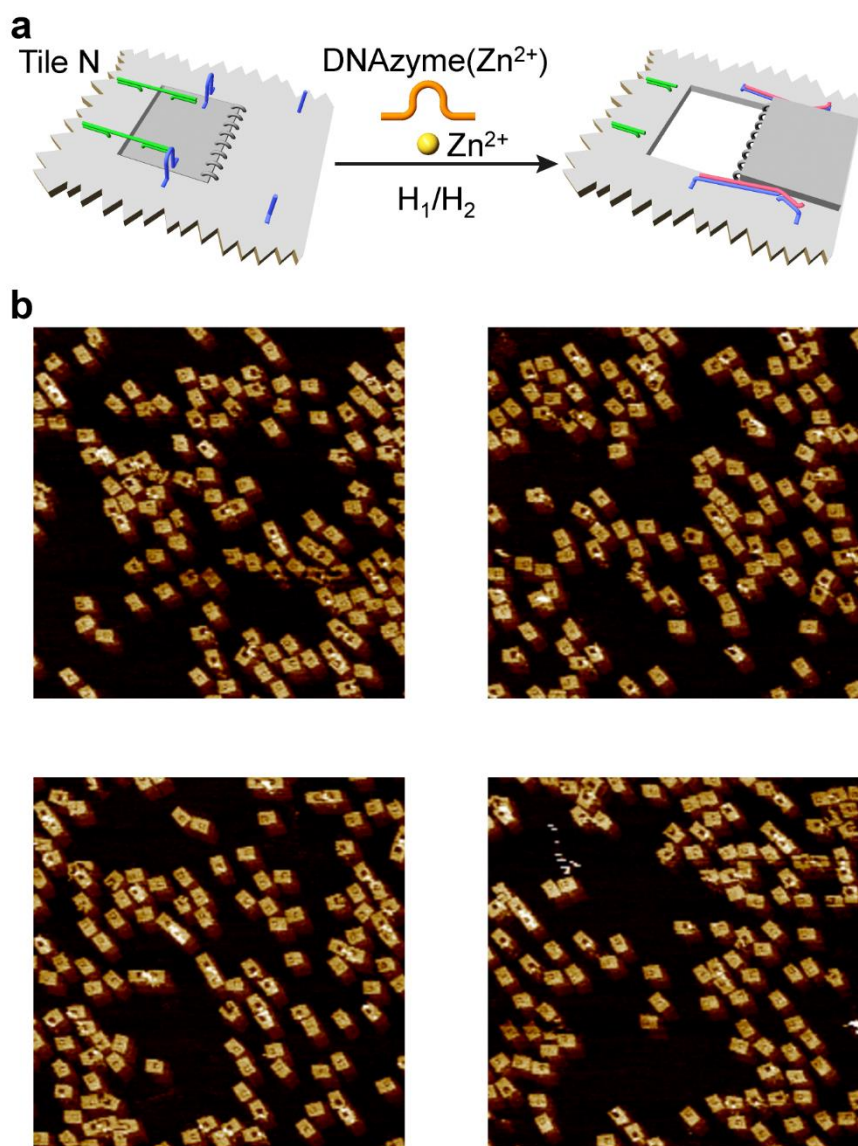

**Supplementary Figure 2. Formation of nanoholes in origami tiles N.** **a**, Schematic of the formation of the nanohole in the origami tile N using the  $\text{Zn}^{2+}$ -ion-dependent DNAzyme and the hairpin helper units  $\text{H}_1/\text{H}_2$ . **b**, Four AFM scanned areas of the  $\text{Zn}^{2+}$ -ion-dependent DNAzyme-driven unlocked origami tiles. Scale bar: 200 nm.

**Supplementary Table 1. Statistical analysis of the yields of the unlocked and locked origami tiles N upon the addition of Zn<sup>2+</sup> ions and the hairpin helper units H<sub>1</sub>/H<sub>2</sub>. Analysis of the unlocked and locked tiles in the four scanned areas shown in Supplementary Fig. 2b.**

| Statistical analysis <sup>a</sup> |           | Unlocked | Locked | Incomplete structure |
|-----------------------------------|-----------|----------|--------|----------------------|
| 1                                 | Count     | 70       | 33     | 7                    |
|                                   | Yield (%) | 63.6     | 30     | 6.4                  |
| 2                                 | Count     | 72       | 22     | 6                    |
|                                   | Yield (%) | 72       | 22     | 6                    |
| 3                                 | Count     | 79       | 29     | 3                    |
|                                   | Yield (%) | 71.2     | 26.1   | 2.7                  |
| 4                                 | Count     | 71       | 25     | 6                    |
|                                   | Yield (%) | 69.6     | 24.5   | 5.9                  |

**a.** The statistical analysis of the unlocked origami tiles involved the identification of intact origami structures that included open cavities. Locked structures were identified as tiles that included non-identified cavity. Imperfect structures were identified as tiles with damaged origami scaffolds or questionable evolved cavities.

## **Control experiments for the unlocking of the origami tiles by the Zn<sup>2+</sup>-ion-dependent DNAzyme**

Supplementary Fig. 3 shows the AFM images upon treatment of the origami tile N with hairpins H<sub>1</sub>/H<sub>2</sub> in the absence of Zn<sup>2+</sup> ions. No formation of nanoholes in the origami scaffold is observed implying that the activation of the Zn<sup>2+</sup>-ion-dependent DNAzyme is essential to generate the nanoholes. Supplementary Fig. 4 show the AFM images of origami tiles N subjected to Zn<sup>2+</sup> ions in the absence of the “stretching” hairpins H<sub>1</sub>/H<sub>2</sub>. The yield of nanohole-containing tiles is very low, ca. 8% as compared to 70% yield in the presence of H<sub>1</sub>/H<sub>2</sub> (see text). These results indicate that the cleavage of the locks by the Zn<sup>2+</sup>-ion-dependent DNAzyme itself is insufficient to control the “mechanical” opening of the “window”. Only in the presence of H<sub>1</sub>/H<sub>2</sub>, the helper assisted stretching of the “window” through the helper units leads to the high-yield generation of the nanoholes. It should be noted that addition of H<sub>1</sub>/H<sub>2</sub> to the low-yield origami mixture shown in Supplementary Fig. 4, stimulated the efficient high-yield unlocking of the origami structures, consistent with the H<sub>1</sub>/H<sub>2</sub> mechanically driven opening of the nanoholes.

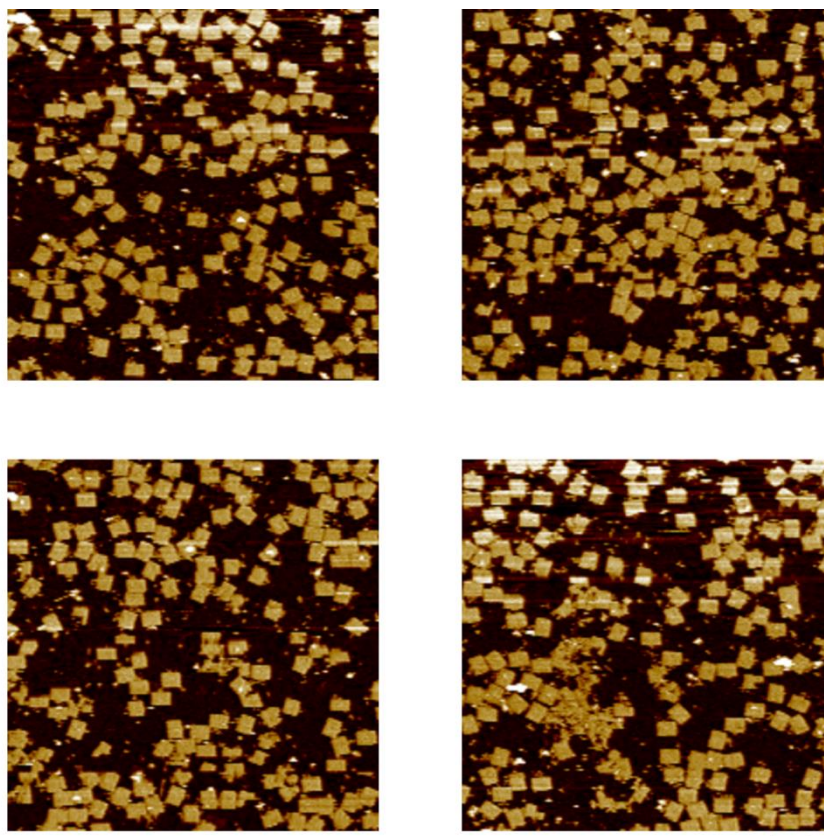

**Supplementary Figure 3. AFM images of the control experiments examining the unlocking of the origami tiles N in the presence of the helper hairpins H<sub>1</sub>/H<sub>2</sub> and the Zn<sup>2+</sup>-ion-dependent DNAzyme sequence, in the absence of added Zn<sup>2+</sup> ions. No tiles with nanoholes are observed, implying that the Zn<sup>2+</sup>-ion-dependent DNAzyme is essential to unlock the origami tiles to yield the nanoholes. Scale bar: 200 nm.**

**Supplementary Table 2. Statistical analysis of the yields of the unlocked and locked origami tiles N upon the addition of the helper hairpins H<sub>1</sub>/H<sub>2</sub> and the Zn<sup>2+</sup>-ion-dependent DNAzyme sequence, in the absence of Zn<sup>2+</sup> ions. Analysis of the unlocked and locked tiles in the four scanned areas shown in Supplementary Fig. 3.**

| Statistical analysis <sup>a</sup> |           | Unlocked | Locked | Incomplete structure |
|-----------------------------------|-----------|----------|--------|----------------------|
| 1                                 | Count     | 0        | 135    | 13                   |
|                                   | Yield (%) | 0        | 91.2   | 8.8                  |
| 2                                 | Count     | 0        | 124    | 28                   |
|                                   | Yield (%) | 0        | 81.6   | 18.4                 |
| 3                                 | Count     | 0        | 116    | 26                   |
|                                   | Yield (%) | 0        | 81.7   | 18.3                 |
| 4                                 | Count     | 0        | 118    | 9                    |
|                                   | Yield (%) | 0        | 92.9   | 7.1                  |

**a.** The statistical analysis of the locked origami tiles involved the identification of intact origami structures. Imperfect structures were identified as tiles with damaged origami scaffolds.



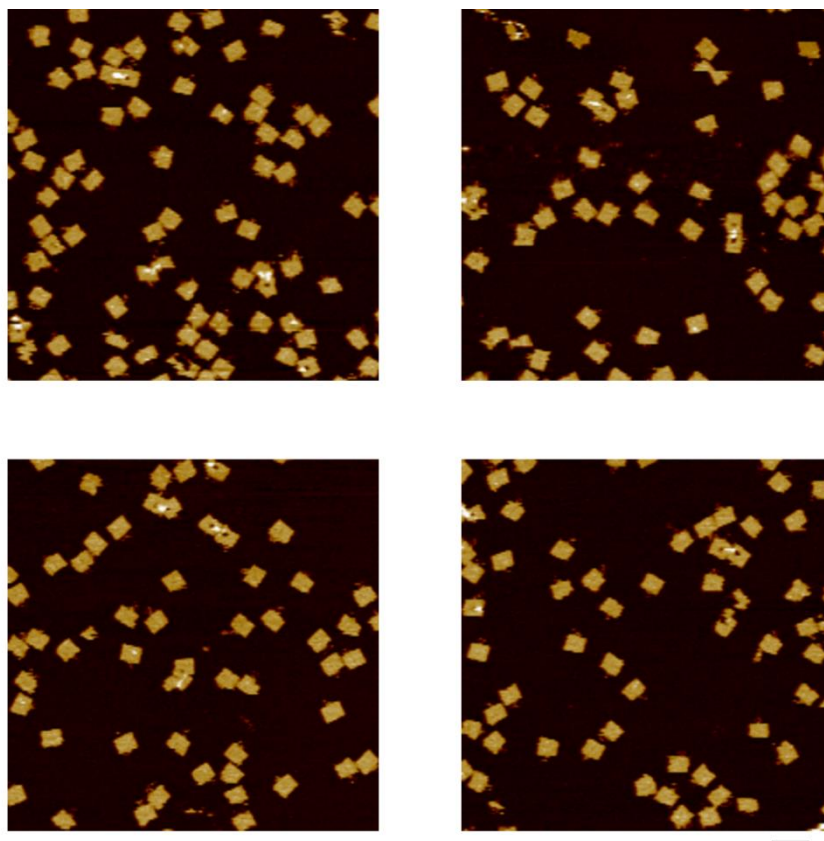

**Supplementary Figure 4. AFM images of the control experiments examining the  $\text{Zn}^{2+}$ -ion-dependent DNzyme unlocking of the origami tiles N in the absence of the hairpin helper units  $\text{H}_1/\text{H}_2$ .** Only few origami tiles show open nanoholes. The results imply that the unlocked “window” exists in a flexible configuration that retains the nanohole closed, in the absence of the hairpin helper units  $\text{H}_1/\text{H}_2$  that stretch the “window” to a rigid configuration by the hairpins/handles/anchor site units. Scale bar: 200 nm.

**Supplementary Table 3. Statistical analysis of the yields of the unlocked and locked origami tiles N upon the addition of Zn<sup>2+</sup> ions and the Zn<sup>2+</sup>-ion-dependent DNAzyme sequence, in the absence of the helper H<sub>1</sub>/H<sub>2</sub>. Analysis of the unlocked and locked tiles in the four scanned areas shown in Supplementary Fig. 4.**

| Statistical analysis <sup>a</sup> |           | Unlocked | Locked | Incomplete structure |
|-----------------------------------|-----------|----------|--------|----------------------|
| 1                                 | Count     | 5        | 46     | 1                    |
|                                   | Yield (%) | 9.6      | 88.5   | 1.9                  |
| 2                                 | Count     | 3        | 39     | 4                    |
|                                   | Yield (%) | 6.5      | 84.8   | 8.7                  |
| 3                                 | Count     | 4        | 55     | 5                    |
|                                   | Yield (%) | 6.3      | 85.9   | 7.8                  |
| 4                                 | Count     | 5        | 44     | 1                    |
|                                   | Yield (%) | 10       | 88     | 2                    |

**a.** The statistical analysis of the unlocked origami tiles involved the identification of intact origami structures. Locked structures were identified as tiles with non-identified cavity. Imperfect structures were identified as tiles with damaged origami scaffolds or questionable evolved cavities.

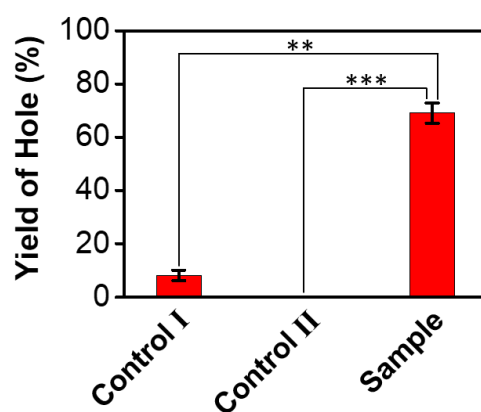

**Supplementary Figure 5. Statistical analysis of the yields of nanoholes in the DNA origami N unlocking by  $Zn^{2+}$ -ion-dependent DNAzyme and the control measurement I without helper strands ( $H_1/H_2$ ) or the control measurement II without  $Zn^{2+}$  ions and the statistically significant difference according to Student's T-test. \*\* $P < 0.001$ , \*\*\* $P < 0.0005$ .**

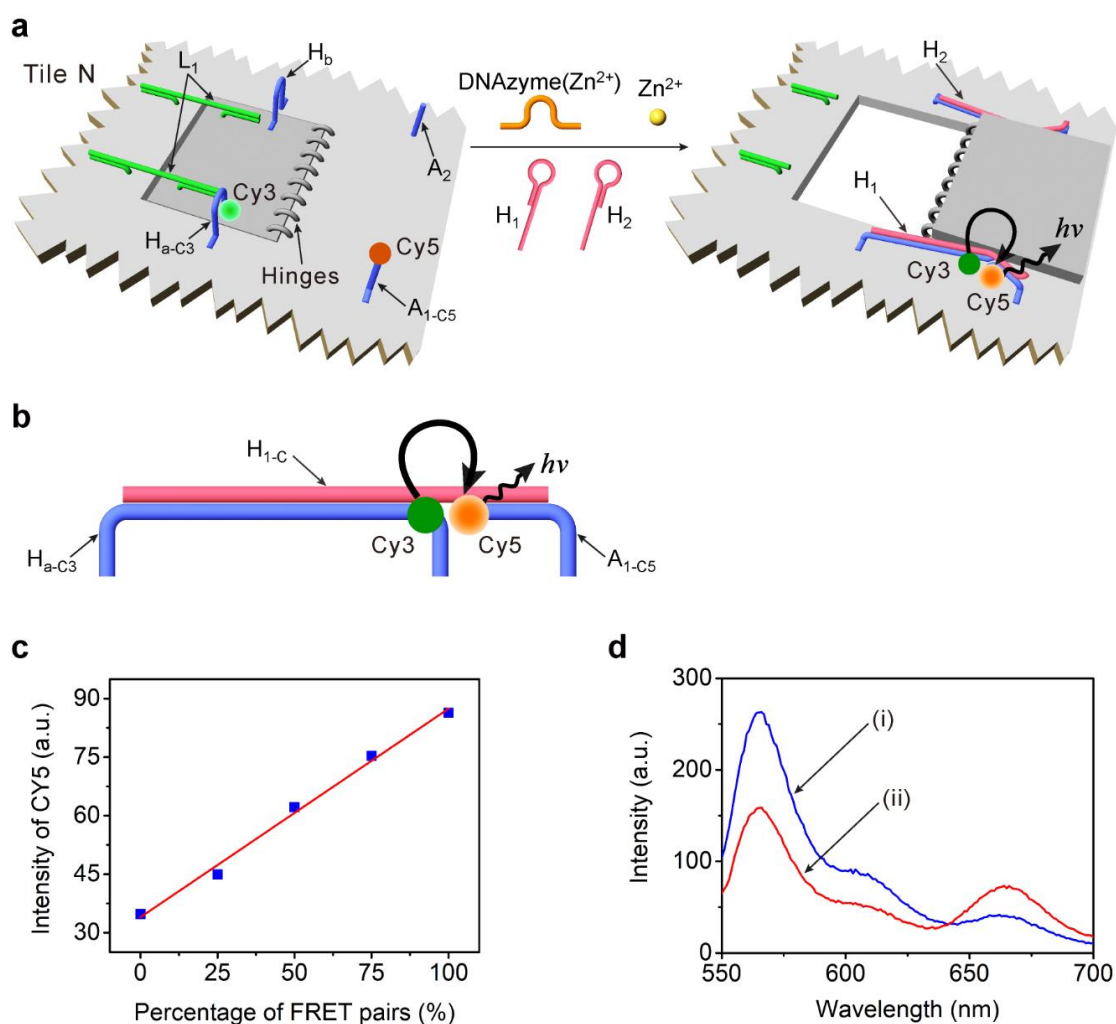

**Supplementary Figure 6. Probing the  $Zn^{2+}$ -ion-dependent DNAzyme-stimulated formation of nanoholes in the origami tile using FRET.** **a**, Analysis of the  $Zn^{2+}$ -ion-dependent DNAzyme-driven unlocking of the origami tile N by FRET. One of the handle unit associated with closed “window”,  $H_{a-c3}$ , is internally modified by Cy3. The anchoring foothold linked to the origami scaffold  $A_{1-c5}$  is functionalized with Cy5. The “window” is opened after its unlocking by the  $Zn^{2+}$ -ion-dependent DNAzyme, and using the helper hairpins  $H_1$  and  $H_2$  to fix the “window” to the footholds. In the resulting structure, the FRET signal provides an optical stimuli to follow the opening of the “window”. **b**, In order to quantify the yield of the open cavities, a model construct consisting of the strands  $H_{a-c3}$  and  $A_{1-c5}$  (at concentration identical to their distribution on origami tile N, 20 nM) were crosslinked by variable concentrations of the strand  $H_{1-c}$  (0 nM, 5 nM, 10 nM, 15 nM and 20 nM). The resulting FRET signal provided a quantitative measure for the hybrid model  $(H_{a-c3}+A_{1-c5})/H_1$ . **c**, Calibration curve corresponding to the FRET signal of the supramolecular model construct as a function of the percentage of FRET pairs. Source data are provided as a Source Data file. **d**, Luminescence spectra of: (i) The  $Zn^{2+}$ -ion-dependent DNAzyme-stimulated unlocked “window” prior to the addition of the helper units  $H_1$  and  $H_2$ . (ii) After treatment of the  $Zn^{2+}$ -ion-dependent DNAzyme unlocked “window” with the helper units  $H_1$  and  $H_2$  and

the opening of the “window”. In both spectra,  $\lambda_{\text{ex}} = 532$  nm (for Cy3) and the FRET signal is monitored at  $\lambda_{\text{em}} = 665$  nm. Note that the FRET process leads to the decrease of the fluorescence intensity of Cy3 at  $\lambda_{\text{em}} = 564$  nm and the increase of the fluorescence intensity of Cy5 at  $\lambda_{\text{em}} = 665$  nm.

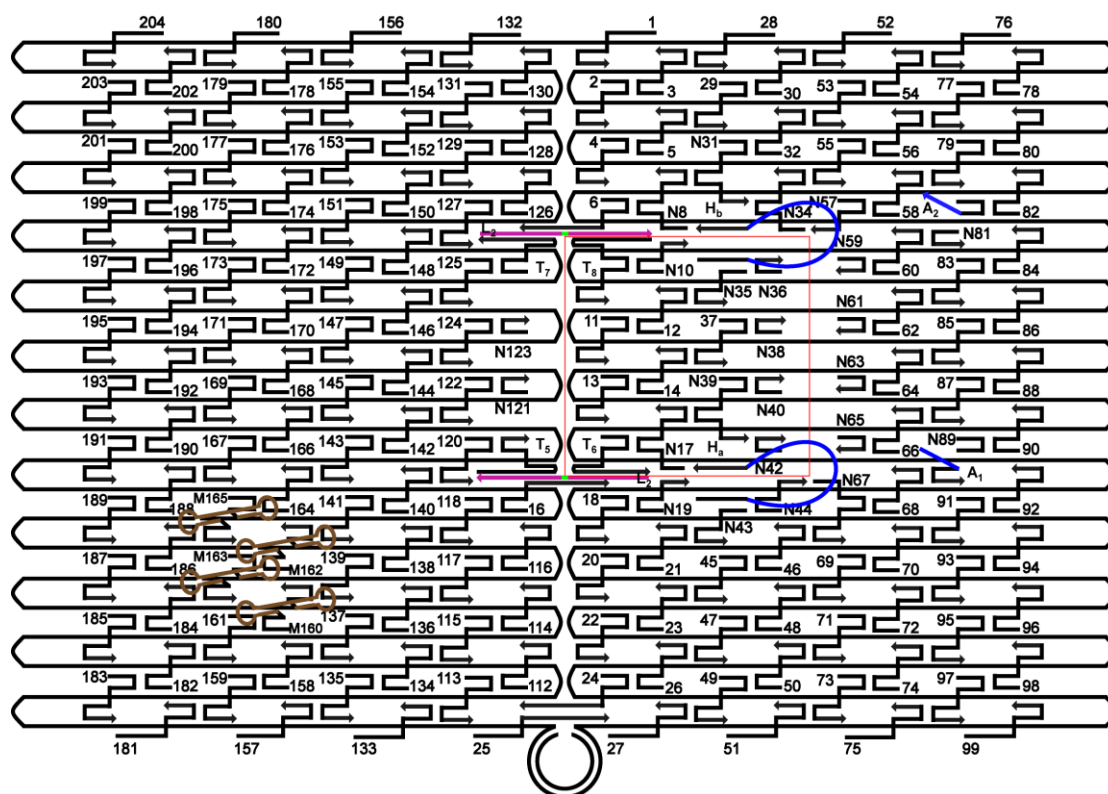

**Supplementary Figure 7. Schematic of the designed origami tile M.** The linker strand  $L_2$  shows in purple, the handles ( $H_a$ ,  $H_b$ ) are blue loops and the anchoring tethers ( $A_1$ ,  $A_2$ ) are short blue lines. The red square shows the area of the designed “window” in the origami tile M. The four hairpins in brown are the labels on the bottom-left of the tile M.

The designed “window” is locked to the origami scaffold on its right side using two linker strands  $L_2$  (purple)<sup>1</sup>. One of the linker  $L_2$  is hybridized with the strand extending from the staple strand  $T_5$  on the origami tile scaffold and the strand extending from the staple strand  $T_6$  on the left side of the designed “window”. The other one binds to the  $T_7$  and  $T_8$ . The linker strands  $L_2$  contain the sequences of the substrate of the  $Pb^{2+}$ -ion-dependent DNase that can unlock the “window” by the cleavage of the linker strands. The handles and the anchoring footholds are the same as for the origami tile N in Supplementary Fig. 1. The staples on the left edge and the right edge are removed to avoid the aggregation of the origami tiles<sup>1</sup>.

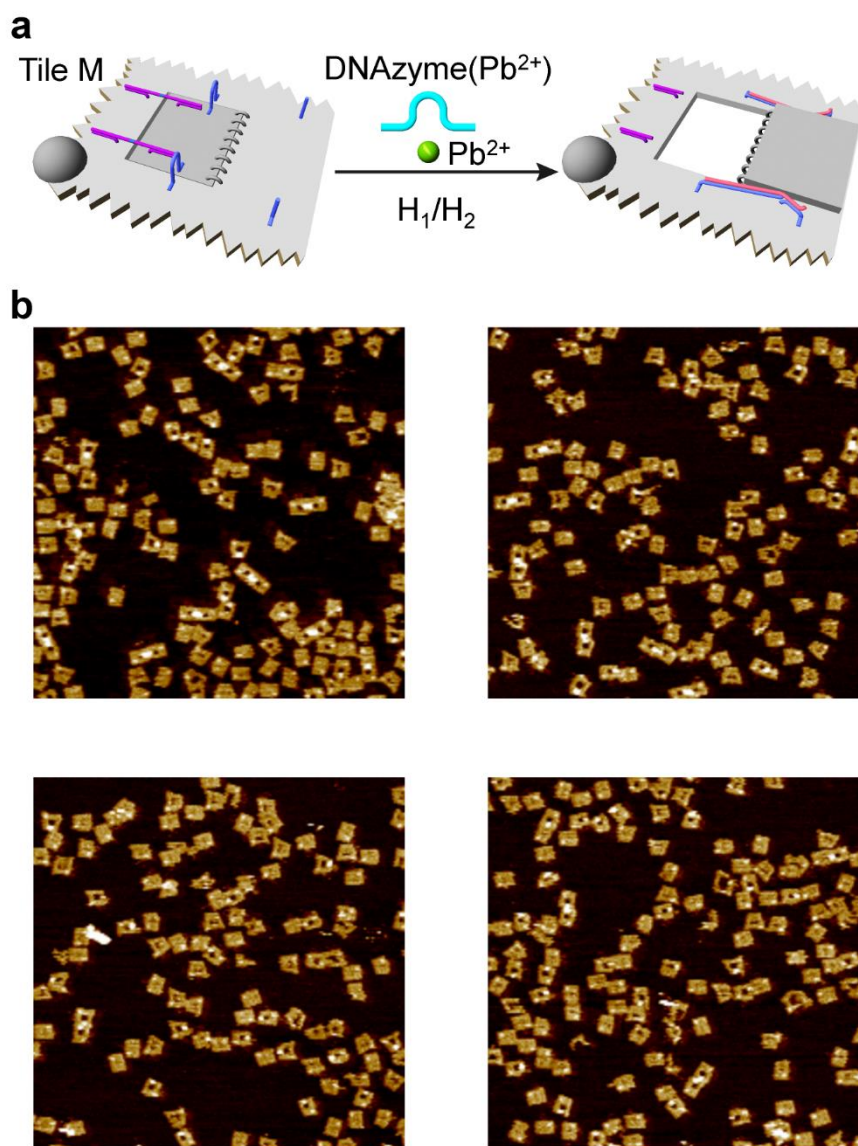

**Supplementary Figure 8. Formation of nanoholes in origami tiles M.** **a**, Schematic of the formation of the nanohole in the origami tile M using the  $\text{Pb}^{2+}$ -ion-dependent DNAzyme and the hairpin helper units  $\text{H}_1/\text{H}_2$ . **b**, Four AFM scanned areas of the  $\text{Pb}^{2+}$ -ion-dependent DNAzyme-driven unlocked origami tiles. Scale bar: 200 nm.

**Supplementary Table 4. Statistical analysis of the yields of the unlocked and locked origami tiles M upon the addition of Pb<sup>2+</sup> ions and the hairpin helper units H<sub>1</sub>/H<sub>2</sub>. Analysis of the unlocked and locked tiles in the four scanned areas shown in Supplementary Fig. 8b.**

| Statistical analysis <sup>a</sup> |           | Unlocked | Locked | Incomplete structure |
|-----------------------------------|-----------|----------|--------|----------------------|
| 1                                 | Count     | 56       | 16     | 4                    |
|                                   | Yield (%) | 73.7     | 21.1   | 5.3                  |
| 2                                 | Count     | 63       | 16     | 5                    |
|                                   | Yield (%) | 75       | 19.0   | 6.0                  |
| 3                                 | Count     | 69       | 28     | 3                    |
|                                   | Yield (%) | 69       | 28     | 3                    |
| 4                                 | Count     | 66       | 19     | 5                    |
|                                   | Yield (%) | 73.3     | 21.1   | 5.6                  |

**a.** The statistical analysis of the unlocked origami tiles involved the identification of intact origami structures that included open cavities and clear markers units on the tiles. Locked structures were identified as tiles that included a clear marker with non-identified cavity. Imperfect tiles were identified as damaged origami scaffolds.



## **Control experiments for the unlocking of the origami tiles by the $\text{Pb}^{2+}$ -ion-dependent DNAzyme**

Supplementary Fig. 9 shows the AFM images upon treatment of the origami tile M with hairpins  $\text{H}_1/\text{H}_2$  in the absence of  $\text{Pb}^{2+}$  ions. No formation of nanoholes in the origami scaffold is observed implying that the activation of the  $\text{Pb}^{2+}$ -ion-dependent DNAzyme is essential to generate the holes. Supplementary Fig. 10 show the AFM images of origami tiles M subjected to  $\text{Pb}^{2+}$  ions in the absence of the “stretching” hairpins  $\text{H}_1/\text{H}_2$ . The yield of nanohole-containing tiles is very low, ca. 8% as compared to 72% yield in the presence of  $\text{H}_1/\text{H}_2$  (see text). These results indicate that the cleavage of the locks by the  $\text{Pb}^{2+}$ -ion-dependent DNAzyme is insufficient to control the “mechanical” opening of the “window”. Only in the presence of  $\text{H}_1/\text{H}_2$ , the helper assisted stretching of the “window” through the helper units leads to the high-yield generation of the nanoholes. It should be noted that addition of  $\text{H}_1/\text{H}_2$  to the low-yield origami mixture shown in Supplementary Fig. 10, stimulated the efficient high-yield unlocking of the origami structures, consistent with the  $\text{H}_1/\text{H}_2$  mechanically driven opening of the nanoholes.

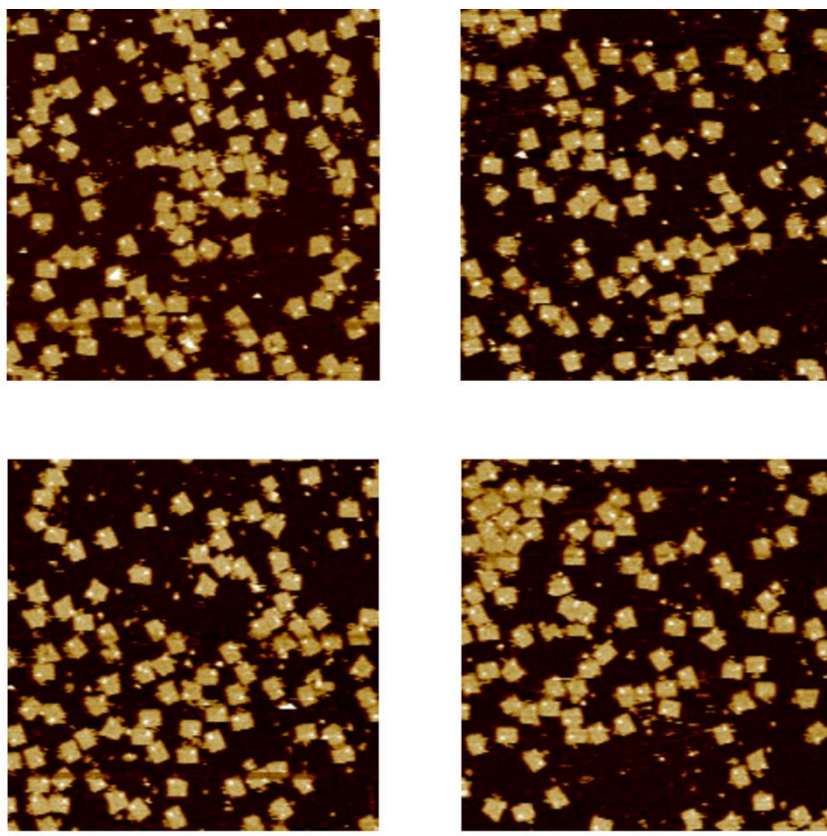

**Supplementary Figure 9. AFM images of the control experiments examining the unlocking of the origami tiles M in the presence of the helper hairpins H<sub>1</sub>/H<sub>2</sub> and the Pb<sup>2+</sup>-ion-dependent DNzyme sequence, in the absence of added Pb<sup>2+</sup> ions. No tiles with nanoholes are observed, implying that the Pb<sup>2+</sup>-ion-dependent DNzyme is essential to unlock the origami tiles to yield the nanoholes. Scale bar: 200 nm.**

**Supplementary Table 5. Statistical analysis of the yields of the unlocked and locked origami tiles M upon the addition of the helper hairpins H<sub>1</sub>/H<sub>2</sub> and the Pb<sup>2+</sup>-ion-dependent DNazyme sequence, in the absence of Pb<sup>2+</sup> ions. Analysis of the unlocked and locked tiles in the four scanned areas shown in Supplementary Fig. 9.**

| Statistical analysis <sup>a</sup> |           | Unlocked | Locked | Incomplete structure |
|-----------------------------------|-----------|----------|--------|----------------------|
| 1                                 | Count     | 0        | 93     | 8                    |
|                                   | Yield (%) | 0        | 92.1   | 7.9                  |
| 2                                 | Count     | 0        | 83     | 3                    |
|                                   | Yield (%) | 0        | 96.5   | 3.5                  |
| 3                                 | Count     | 0        | 84     | 2                    |
|                                   | Yield (%) | 0        | 97.7   | 2.3                  |
| 4                                 | Count     | 0        | 88     | 3                    |
|                                   | Yield (%) | 0        | 96.7   | 3.3                  |

**a.** The statistical analysis of the locked origami tiles involved the identification of intact origami structures without cavity. Imperfect tiles were identified as damaged origami scaffolds.

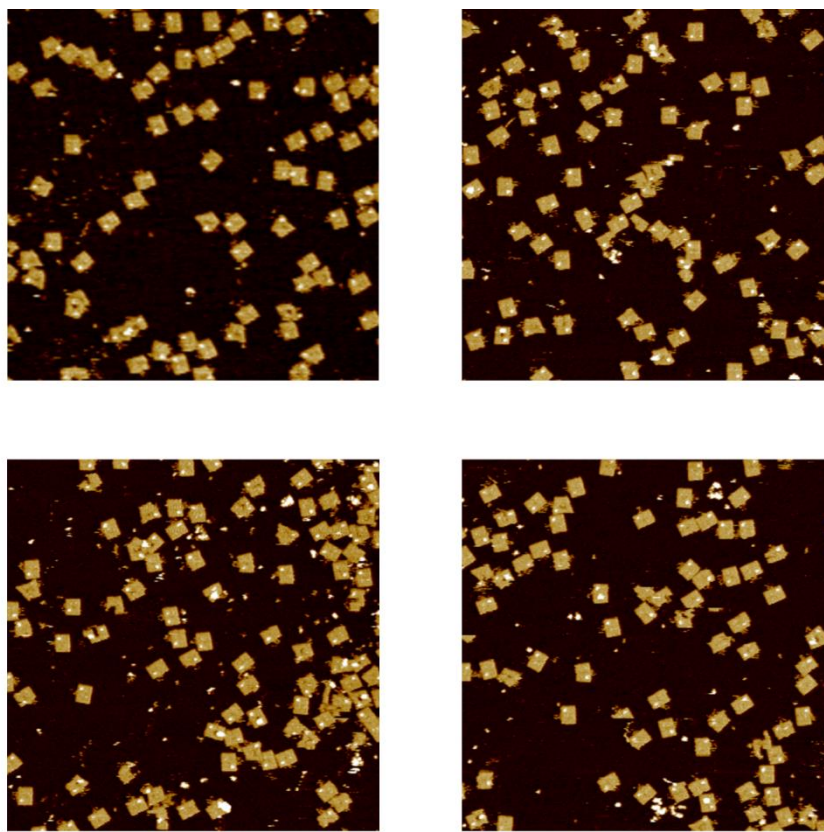

**Supplementary Figure 10. AFM images of the control experiments examining the  $\text{Pb}^{2+}$ -ion-dependent DNzyme unlocking of the origami tiles M in the absence of the hairpin helper units  $\text{H}_1/\text{H}_2$ . Only few origami tiles show open nanoholes. The results imply that the unlocked “window” exists in a flexible configuration that retains the nanohole closed, in the absence of the hairpin helper units  $\text{H}_1/\text{H}_2$  that stretch the “window” to a rigid configuration by the hairpins/handles/anchor site units. Scale bar: 200 nm.**

**Supplementary Table 6. Statistical analysis of the yields of the unlocked and locked origami tiles M upon the addition of Pb<sup>2+</sup> ions and the Pb<sup>2+</sup>-ion-dependent DNazyme sequence, in the absence of the helper hairpins H<sub>1</sub>/H<sub>2</sub>. Analysis of the unlocked and locked tiles in the four scanned areas shown in Supplementary Fig. 10.**

| Statistical analysis <sup>a</sup> |           | Unlocked | Locked | Incomplete structure |
|-----------------------------------|-----------|----------|--------|----------------------|
| 1                                 | Count     | 6        | 61     | 1                    |
|                                   | Yield (%) | 8.7      | 89.7   | 1.5                  |
| 2                                 | Count     | 7        | 61     | 7                    |
|                                   | Yield (%) | 9.3      | 81.3   | 9.3                  |
| 3                                 | Count     | 5        | 52     | 8                    |
|                                   | Yield (%) | 7.7      | 80     | 12.3                 |
| 4                                 | Count     | 4        | 62     | 2                    |
|                                   | Yield (%) | 5.9      | 91.2   | 2.9                  |

**a.** The statistical analysis of the unlocked origami tiles involved the identification of intact origami structures that included open cavities and clear markers units on the tiles. Locked structures were identified as tiles that included a clear marker with non-identified cavity. Imperfect tiles were identified as damaged origami scaffolds.

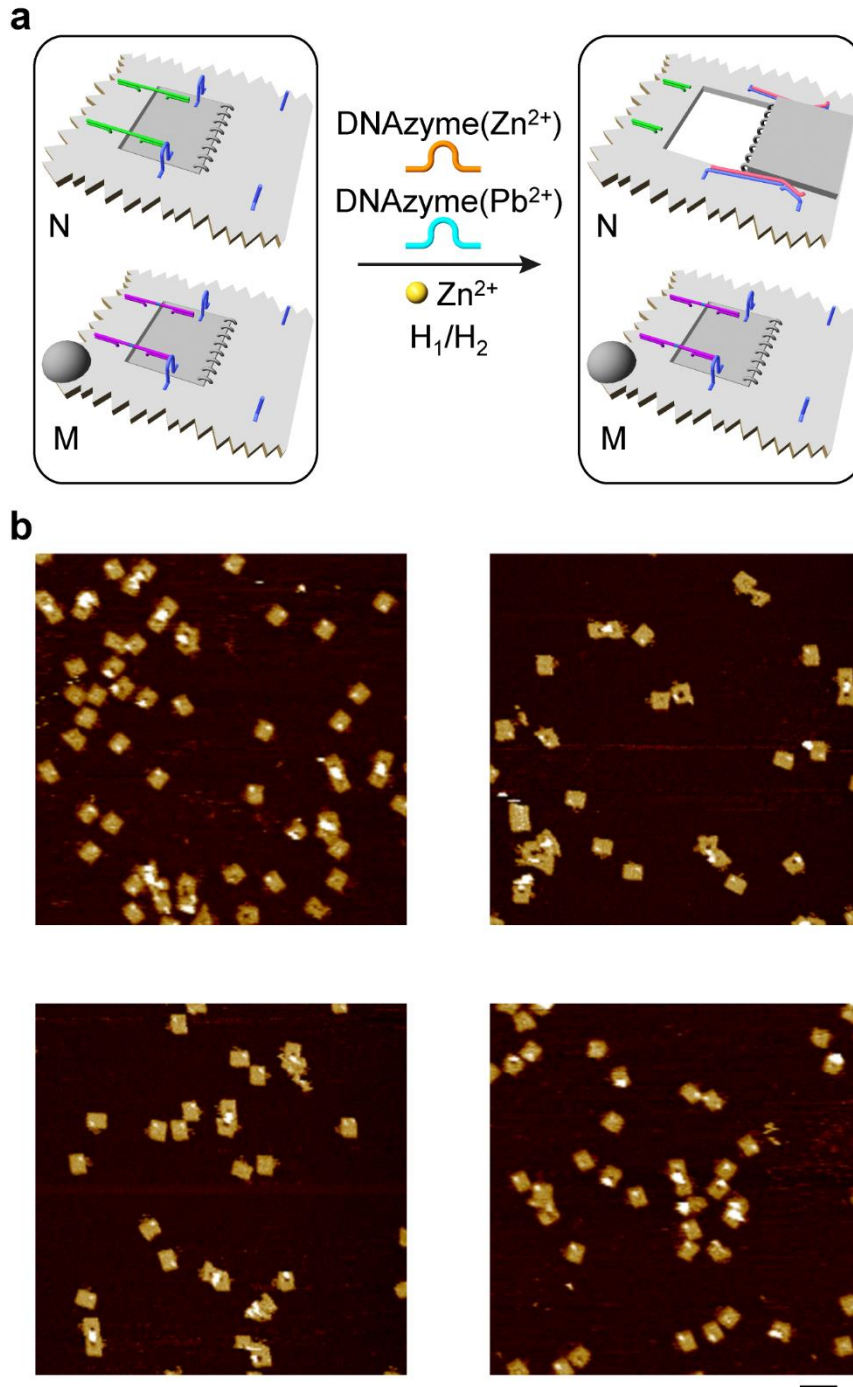

**Supplementary Figure 11. Selective formation of the nanohole associated with the origami tile N in the mixture of N and M. a**, Schematic of the selective unlocking of the origami tile N in the tile mixture of N and M by adding  $\text{Zn}^{2+}$  ions and the hairpins  $\text{H}_1/\text{H}_2$ , in the presence of  $\text{Zn}^{2+}$ -ion- and  $\text{Pb}^{2+}$ -ion-dependent DNAzyme sequences. **b**, Four AFM images corresponding to the selective formation of nanoholes in origami tiles N in the tile mixture of N and M. Scale bar: 200 nm.

**Supplementary Table 7. Statistical analysis of the yields of the unlocked and locked origami tiles N and M by subjecting the tile mixture to Zn<sup>2+</sup> ions and the hairpins H<sub>1</sub>/H<sub>2</sub>, in the presence of Zn<sup>2+</sup>-ion- and Pb<sup>2+</sup>-ion-dependent DNzyme sequences. The analysis is performed on the images shown in Supplementary Fig. 11b.**

| Statistical analysis <sup>a</sup> |           | Origami N |        |                      | Origami M |        |
|-----------------------------------|-----------|-----------|--------|----------------------|-----------|--------|
|                                   |           | Unlocked  | Locked | Incomplete structure | Unlocked  | Locked |
| <b>1</b>                          | Count     | 20        | 6      | 3                    | 1         | 22     |
|                                   | Yield (%) | 69.0      | 20.7   | 10.3                 | 4.3       | 95.7   |
| <b>2</b>                          | Count     | 8         | 2      | 1                    | 1         | 12     |
|                                   | Yield (%) | 72.7      | 18.2   | 9.1                  | 7.7       | 92.3   |
| <b>3</b>                          | Count     | 10        | 3      | 1                    | 0         | 12     |
|                                   | Yield (%) | 71.4      | 21.4   | 7.1                  | 0         | 100    |
| <b>4</b>                          | Count     | 11        | 5      | 1                    | 1         | 15     |
|                                   | Yield (%) | 64.7      | 29.4   | 5.9                  | 6.3       | 93.7   |

**a.** The statistical analysis of the unlocked origami tiles involved the identification of intact origami structures that included open cavities on no marker units. In parallel, marker-containing scaffold with an open cavity were searched (very low content of such structures were identified). Imperfect structures were identified as non-marker containing tiles with damaged origami scaffolds or questionable evolved cavities.

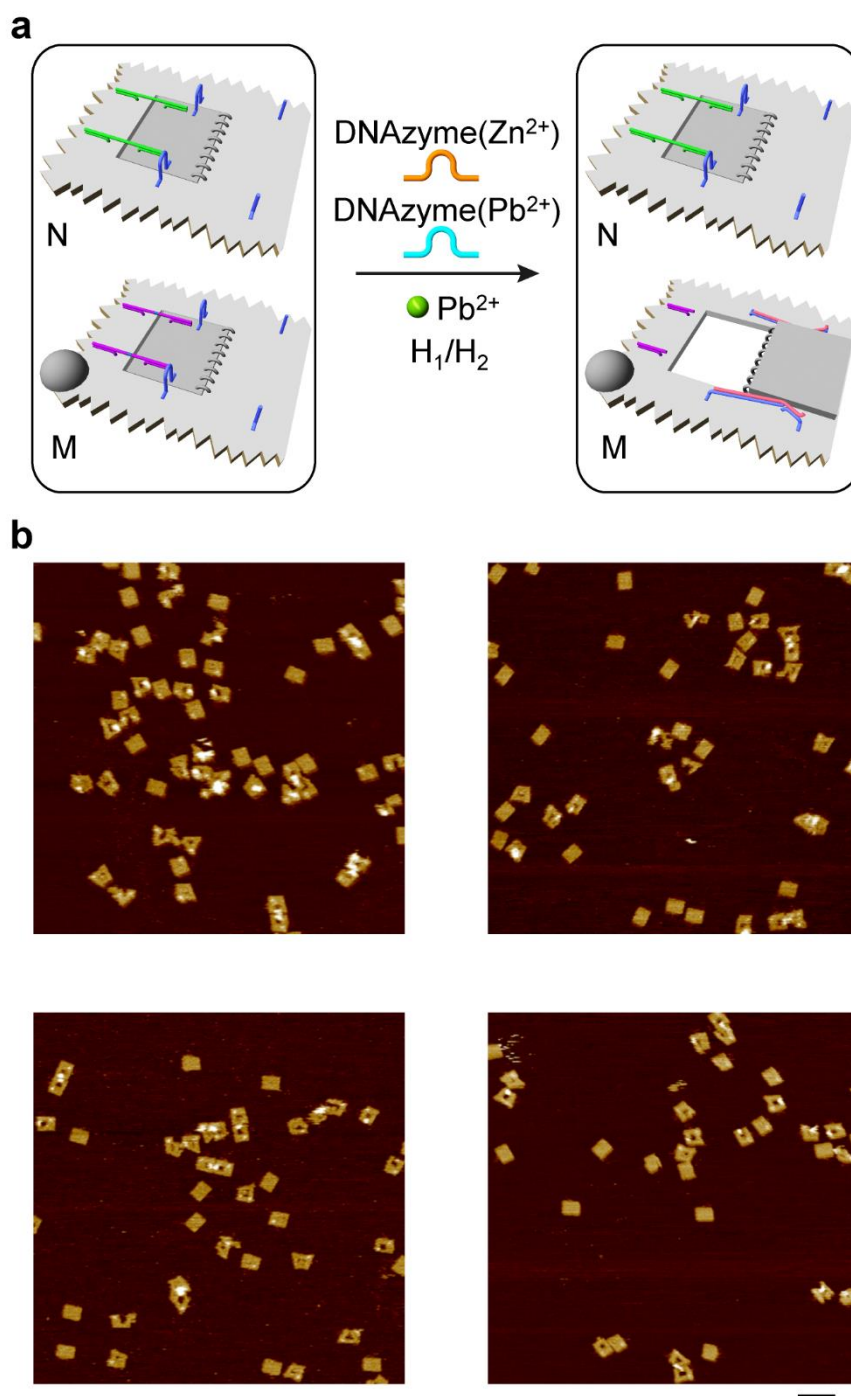

**Supplementary Figure 12. Selective formation of the nanohole in the origami tile M of the mixture of N and M.** **a**, Schematic of the selective unlocking of the origami tile M in the mixture of N and M by adding  $\text{Pd}^{2+}$  ions and the hairpins  $\text{H}_1/\text{H}_2$ , in the presence to  $\text{Zn}^{2+}$ -ion- and  $\text{Pb}^{2+}$ -ion-dependent DNAzyme sequences. **b**, Four AFM images corresponding to the selective formation of nanoholes in tiles M in the mixture of N and M. Scale bar: 200 nm.



**Supplementary Table 8. Statistical analysis of the yields of the unlocked and locked origami tiles N and M by subjecting the tile mixture to Pb<sup>2+</sup> ions and the hairpins H<sub>1</sub>/H<sub>2</sub>, in the presence of Zn<sup>2+</sup>-ion- and Pb<sup>2+</sup>-ion-dependent DNzyme sequences. The analysis is performed on the images shown in Supplementary Fig. 12b.**

| Statistical analysis <sup>a</sup> |           | Origami N |        | Origami M |        |                      |
|-----------------------------------|-----------|-----------|--------|-----------|--------|----------------------|
|                                   |           | Unlocked  | Locked | Unlocked  | Locked | Incomplete structure |
| <b>1</b>                          | Count     | 0         | 20     | 16        | 4      | 3                    |
|                                   | Yield (%) | 0         | 100    | 69.6      | 17.4   | 13.0                 |
| <b>2</b>                          | Count     | 0         | 19     | 12        | 2      | 2                    |
|                                   | Yield (%) | 0         | 100    | 75        | 12.5   | 12.5                 |
| <b>3</b>                          | Count     | 0         | 13     | 16        | 4      | 2                    |
|                                   | Yield (%) | 0         | 100    | 72.7      | 18.2   | 9.1                  |
| <b>4</b>                          | Count     | 0         | 13     | 13        | 4      | 1                    |
|                                   | Yield (%) | 0         | 100    | 72.2      | 22.2   | 5.6                  |

**a.** The statistical analysis of the unlocked origami tiles involved the identification of intact origami structures that included open cavities and clear markers units on the respective open tiles. Locked structures were identified as tiles that included a clear marker with non-identified cavity. Imperfect tiles were identified as marker-containing tiles with damaged origami scaffolds.

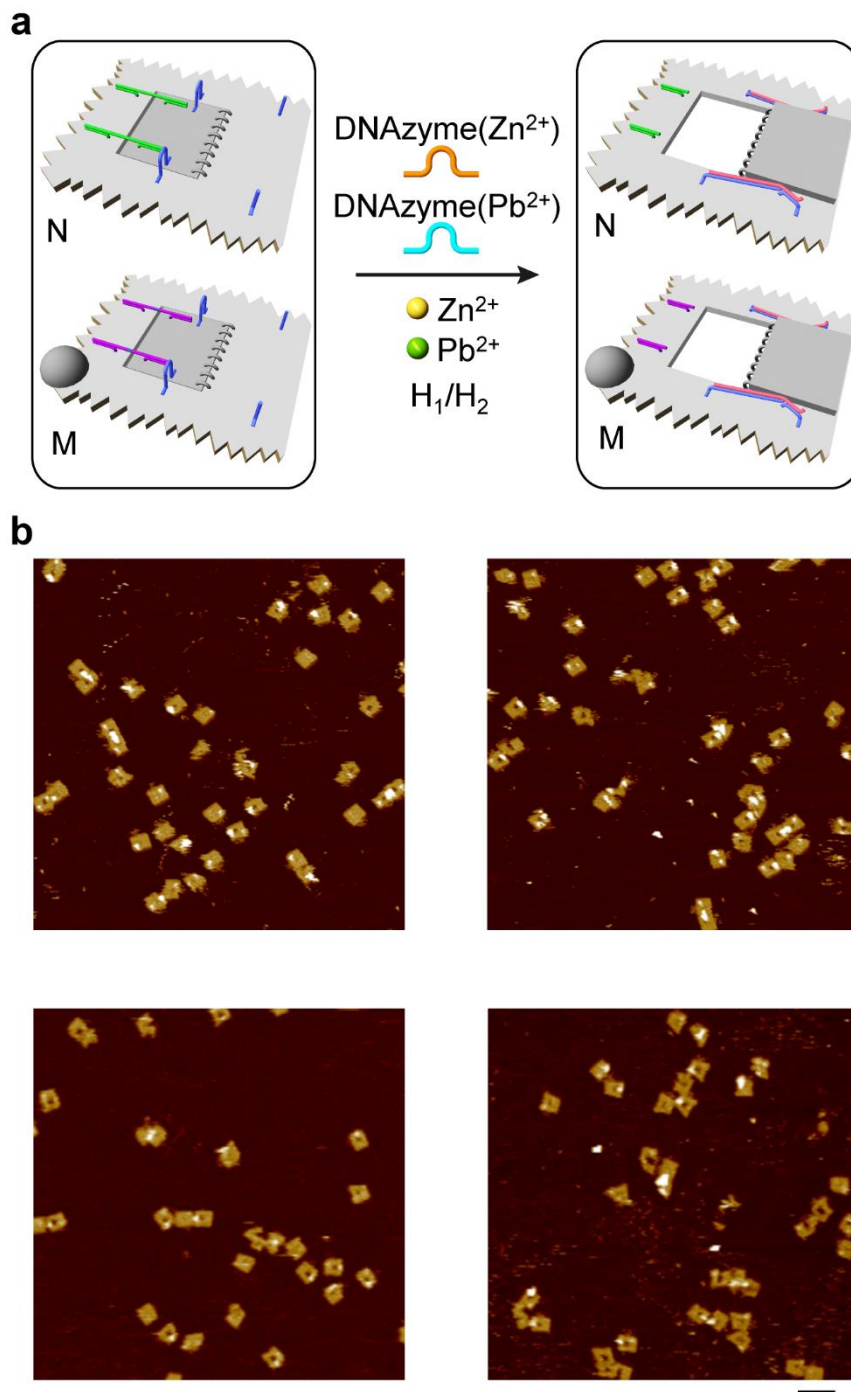

**Supplementary Figure 13. Programmed formation of nanoholes in the origami tile mixture of N and M.** **a**, Schematic of the programmed unlocking of the origami tiles N and M and formation of nanoholes upon the treatment of the mixture with  $\text{Zn}^{2+}$  ions and  $\text{Pb}^{2+}$  ions and the helper hairpins  $\text{H}_1/\text{H}_2$ , in the presence of  $\text{Zn}^{2+}$ -ion- and  $\text{Pb}^{2+}$ -ion-dependent DNAzyme sequences. **b**, Four AFM images of the mixture of origami tiles N and M with programmed nanoholes. Scale bar: 200 nm.

**Supplementary Table 9. Statistical analysis of the yields of the unlocked and locked origami tiles N and M upon the treatment of the tile mixture of N and M with Zn<sup>2+</sup> ions and Pb<sup>2+</sup> ions and the helper units H<sub>1</sub>/H<sub>2</sub>, in the presence of Zn<sup>2+</sup>-ion- and Pb<sup>2+</sup>-ion-dependent DNAzyme sequences. The analysis is performed on the images shown in Supplementary Fig. 13b.**

| Statistical analysis <sup>a</sup> |           | Origami N |        |                      | Origami M |        |                      |
|-----------------------------------|-----------|-----------|--------|----------------------|-----------|--------|----------------------|
|                                   |           | Unlocked  | Locked | Incomplete structure | Unlocked  | Locked | Incomplete structure |
| 1                                 | Count     | 10        | 3      | 1                    | 10        | 3      | 1                    |
|                                   | Yield (%) | 71.4      | 21.4   | 7.1                  | 71.4      | 21.4   | 7.1                  |
| 2                                 | Count     | 11        | 2      | 2                    | 13        | 3      | 1                    |
|                                   | Yield (%) | 73.3      | 13.3   | 13.3                 | 76.5      | 17.6   | 5.9                  |
| 3                                 | Count     | 7         | 2      | 1                    | 7         | 2      | 0                    |
|                                   | Yield (%) | 70        | 20     | 10                   | 77.8      | 22.2   | 0                    |
| 4                                 | Count     | 8         | 2      | 1                    | 8         | 2      | 1                    |
|                                   | Yield (%) | 72.7      | 18.2   | 9.1                  | 72.7      | 18.2   | 9.1                  |

**a.** The statistical analysis of the unlocked origami tiles involved the identification of intact origami structures that included open cavities and without marker or with clear markers units on the respective tiles. Locked structures were identified as tiles that included non-identified cavity with and without clear marker. Imperfect tiles were identified as no marker or marker-containing tiles with damaged origami scaffolds.

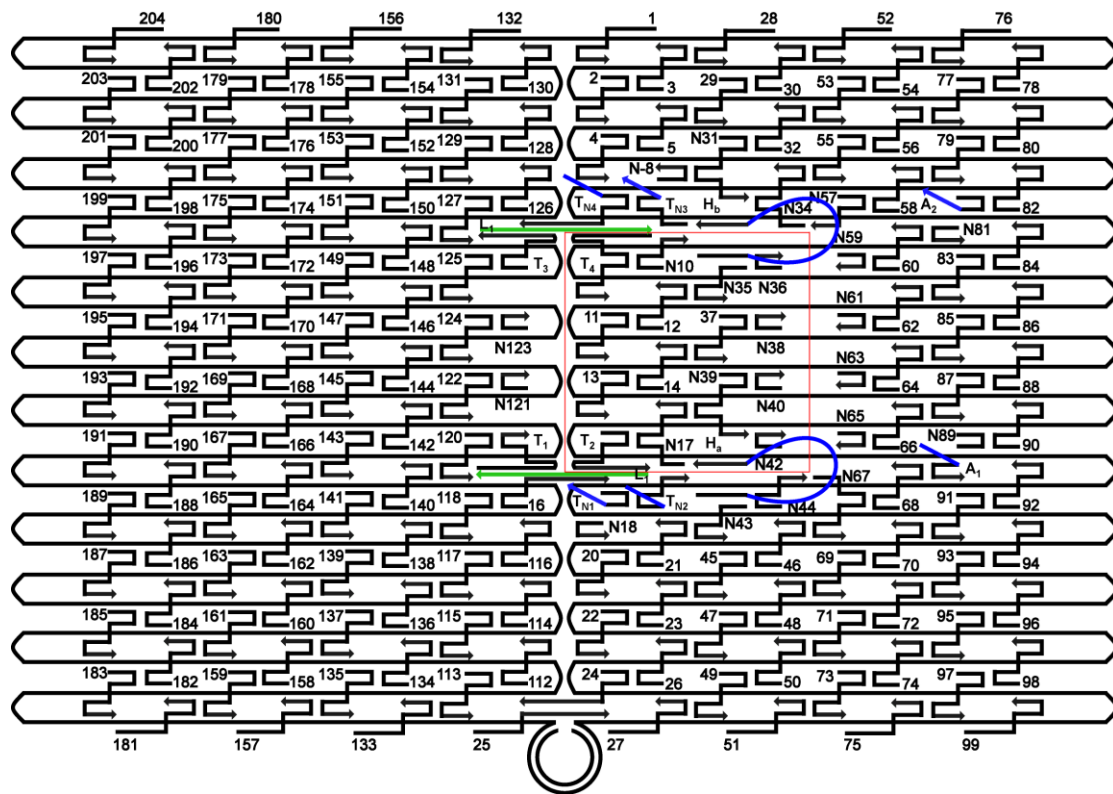

**Supplementary Figure 14. Schematic of the designed origami tile Nr.** The tile is functionalized with two pairs of tethers T<sub>N1</sub>/T<sub>N3</sub> and T<sub>N2</sub>/T<sub>N4</sub> that hybridize with the K<sub>his</sub> and E<sub>his</sub> strands on opposite sides of the tile raft, respectively. The tile N<sub>f</sub> includes the Zn<sup>2+</sup>-ion-dependent DNAzyme-driven unlocking apparatus in tile N, as shown in Supplementary Fig. 1.

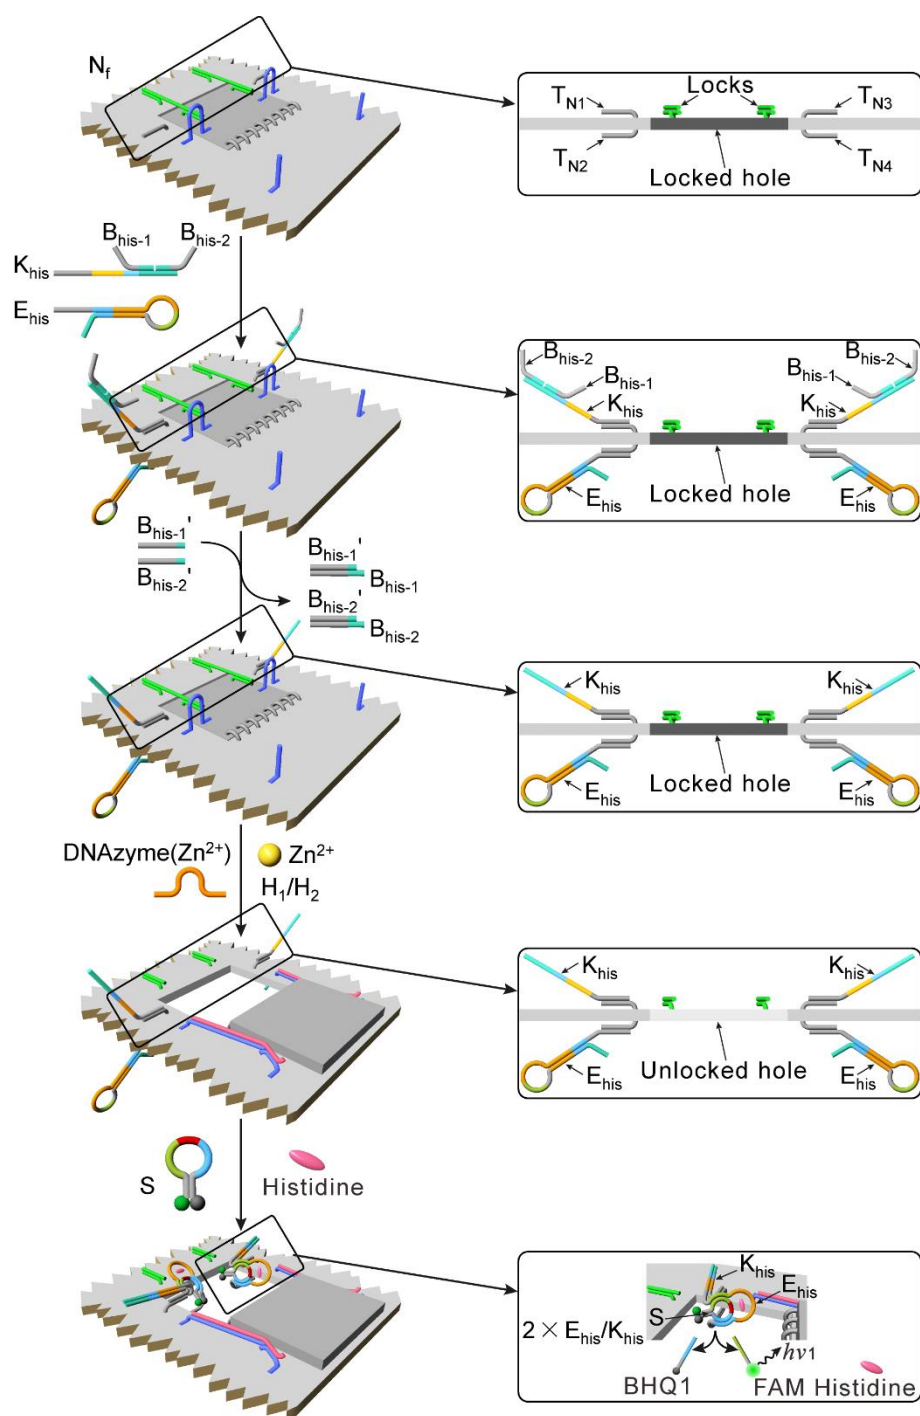

**Supplementary Figure 15. Schematic of engineering of the origami tile  $N_f$  and activation of the catalysis in the confined nanocavity.** The tile  $N_f$  consists of the  $Zn^{2+}$ -ion-dependent DNAzyme unlocking mechanism for the operation of the catalytic histidine-dependent DNAzyme in the confined cavity generated in the origami tile.  $T_{N1}/T_{N3}$  and  $T_{N2}/T_{N4}$  protruding tethers are linked to the opposite sides of the tile  $N_f$ . The blocked duplex  $K_{his}/B_{his-1}/B_{his-2}$  and the hairpin  $E_{his}$  are hybridized with the tethers  $T_{N1}/T_{N3}$  and  $T_{N2}/T_{N4}$ , respectively. Prior to the opening of the “window” guided by the  $Zn^{2+}$ -ion-dependent DNAzyme, the protecting strands  $B_{his-1}$  and  $B_{his-2}$  are displaced by the respective counter strands  $B_{his-1}'$  and  $B_{his-2}'$ , resulting in the free strand  $K_{his}$ . The  $Zn^{2+}$ -ion-dependent DNAzyme-driven opening of the nanohole in the presence of the

$\text{Zn}^{2+}$  ions and the helper hairpins  $\text{H}_1/\text{H}_2$  allows the subsequent interaction between the hairpin  $\text{E}_{\text{his}}$  and the strand  $\text{K}_{\text{his}}$ . As the hairpin  $\text{E}_{\text{his}}$  includes, in a caged configuration, the histidine-dependent DNzyme, its opening by  $\text{K}_{\text{his}}$  yields the uncaged histidine-dependent DNzyme. The resulting catalyst catalyzes the cleavage of FAM/BHQ1-functionalized substrate  $\text{S}$ , and the fluorescence of the cleaved FAM-modified fragment provides a readout signal for the catalytic process that proceeds in the nanocavity.

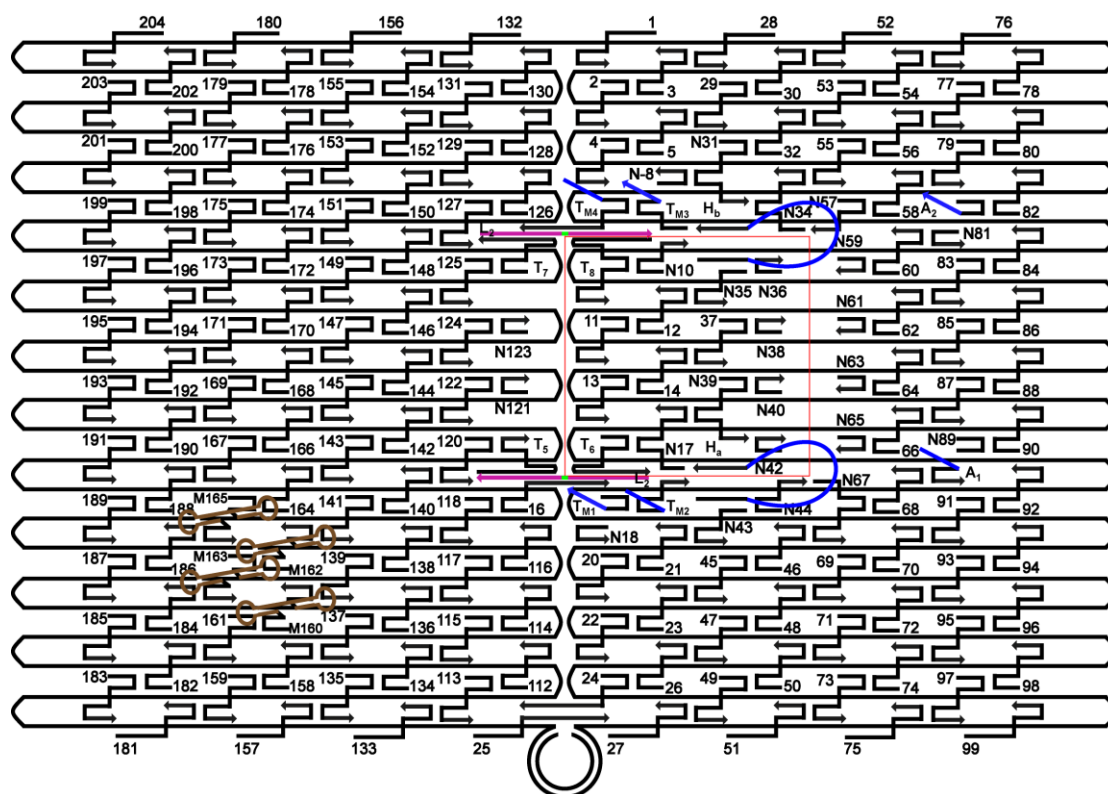

**Supplementary Figure 16. Schematic of the designed origami tile  $M_f$ .** The tile is functionalized with two pairs of tethers  $T_{M1}/T_{M3}$  and  $T_{M2}/T_{M4}$  that hybridize with the  $G_1$  and  $G_2$  strands on opposite sides of the tile raft, respectively. The tile  $M_f$  includes the  $Pb^{2+}$ -ion-dependent DNAzyme-driven unlocking apparatus in tile  $M$ , as shown in Supplementary Fig. 7.

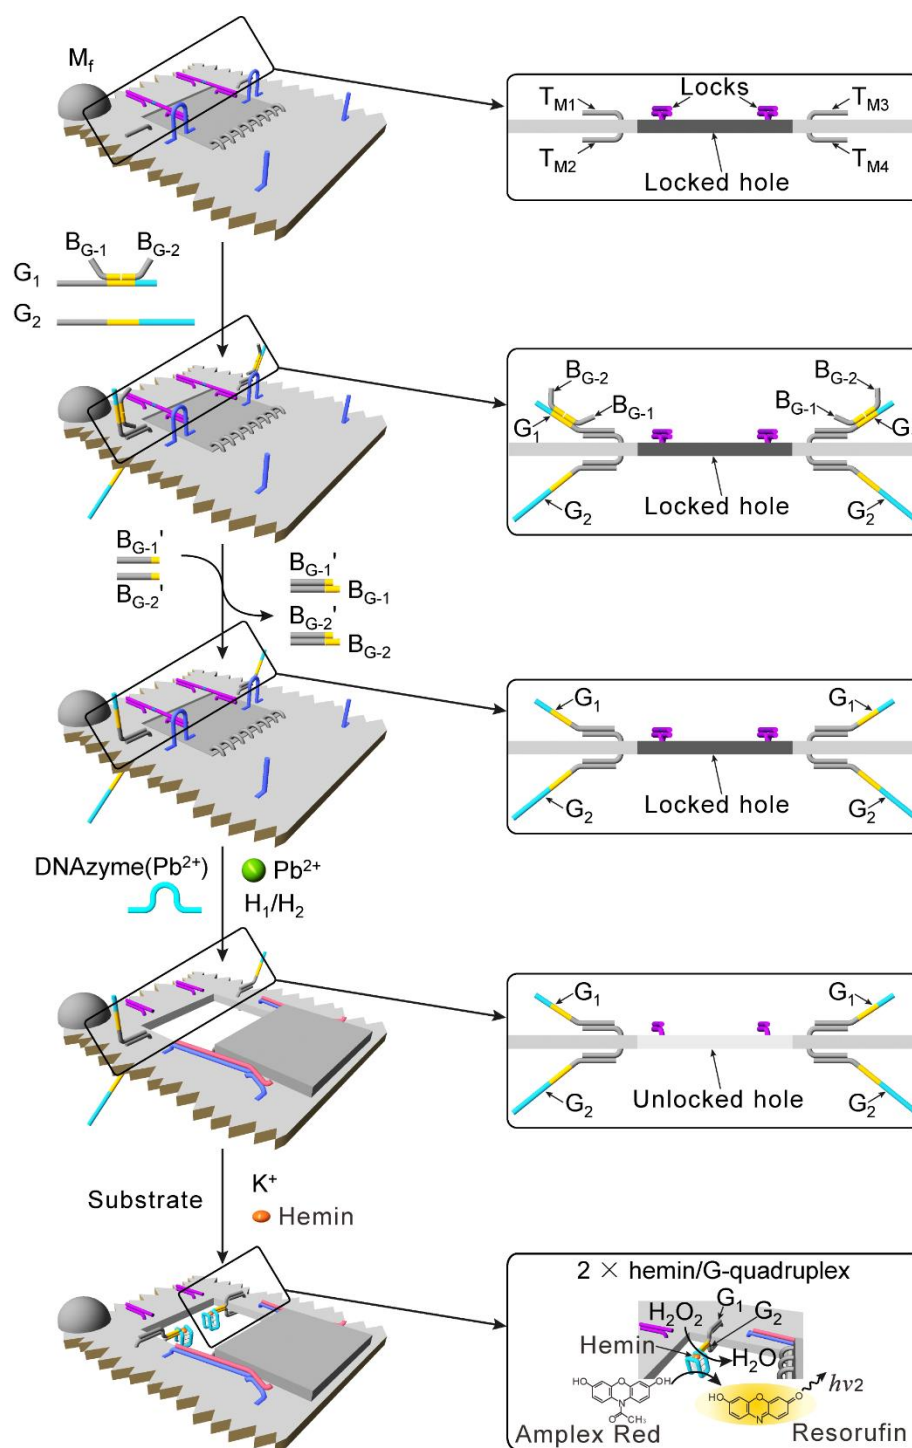

**Supplementary Figure 17. Schematic of engineering of the origami tile  $M_f$  and activation of the catalysis in the confined nanocavity.** The tile  $M_f$  consists of the  $Pb^{2+}$ -ion-dependent DNAzyme unlocking mechanism for the operation of the catalytic hemin/G-quadruplex DNAzyme in the confined cavity generated in the origami tile.  $T_{M1}/T_{M3}$  and  $T_{M2}/T_{M4}$  protruding tethers are linked to the opposite sides of the tile  $M_f$ . The blocked duplex  $G_1/B_{G-1}/B_{G-2}$  and the strand  $G_2$  are hybridized with the tethers  $T_{M1}/T_{M3}$  and  $T_{M2}/T_{M4}$ , respectively. Prior to the opening of the “window” guided by the  $Pb^{2+}$ -ion-dependent DNAzyme, the protecting strands  $B_{G-1}$  and  $B_{G-2}$  are displaced by the respective counter strands  $B_{G-1}'$  and  $B_{G-2}'$ , resulting in the free strand  $G_1$ . The  $Pb^{2+}$ -



ion-dependent DNAzyme-driven opening of the nanohole in the presence of the  $\text{Pb}^{2+}$  ions and the helper hairpins  $\text{H}_1/\text{H}_2$  allows the subsequent interaction between the strands  $\text{G}_1$  and  $\text{G}_2$ . In the presence of  $\text{K}^+$  ions and hemin, the strands  $\text{G}_1$  and  $\text{G}_2$  form the hemin/G-quadruplex horseradish peroxidase mimicking-DNAzymes that catalyze the  $\text{H}_2\text{O}_2$  oxidation of Amplex Red to the fluorescent Resorufin that provides a readout signal for the catalytic process that proceeds in the nanocavity.

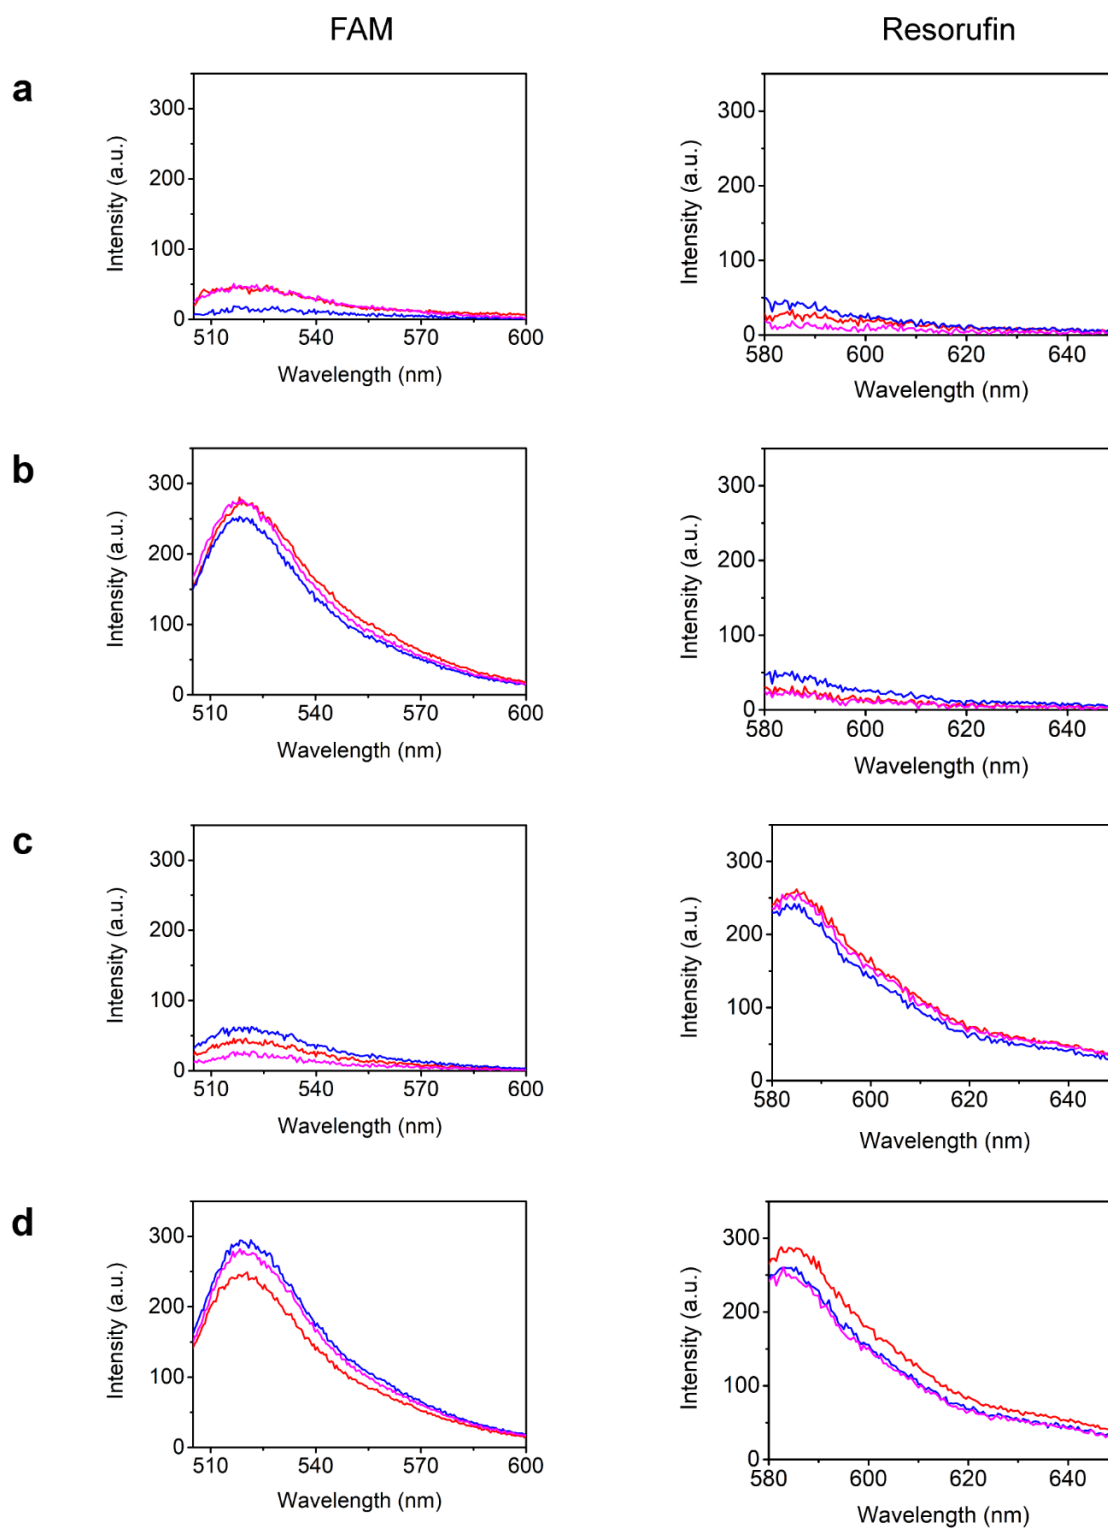

**Supplementary Figure 18. Fluorescence spectra corresponding to the programmed activation of the histidine-dependent DNAzyme and/or the hemin/G-quadruplex DNAzyme in the confined nanocavities.** The programmed activation of the catalytic functions of the histidine-dependent DNAzyme and/or the hemin/G-quadruplex DNAzyme were performed by unlocking the nanoholes in the tile mixture of  $N_f$  and  $M_f$  by treatment of the mixture with the  $Zn^{2+}$  ions and/or  $Pb^{2+}$  ions and the

help hairpins  $H_1/H_2$ , in the presence of  $Zn^{2+}$ -ion- and  $Pb^{2+}$ -ion-dependent DNAzyme sequences. **a**, Fluorescence spectra of FAM (left) and Resorufin (right) generated by the locked origami mixture of  $N_f$  and  $M_f$  (shown in top middle of Fig. 3). **b**, Fluorescence spectra of FAM (left) and Resorufin (right) generated upon selective unlocking of the tile  $N_f$  in the mixture with the  $Zn^{2+}$ -ion-dependent DNAzyme (cf. middle left in Fig. 3). The fluorescence spectra of FAM shows the enhanced intensity over the background signal generated in the confined cavity. **c**, Fluorescence spectra of FAM (left) and resorufin (right) upon subjecting the tile mixture of  $N_f$  and  $M_f$  to the  $Pb^{2+}$ -ion-dependent DNAzyme (cf. process shown in middle center in Fig. 3). No fluorescence change of FAM above the background signal is observed, while the fluorescence of Resorufin is enhanced as compared to the background fluorescence signal. **d**, Fluorescence spectra of FAM (left) and Resorufin (right) generated upon subjecting the tile mixture of  $N_f$  and  $M_f$  to the  $Zn^{2+}$ -ion- and  $Pb^{2+}$ -ion-dependent DNAzymes (cf. process shown in middle right of Fig. 3). The fluorescence of FAM and the fluorescence of Resorufin are intensified as compared to the background signals, consistent with the activation of the two DNAzymes in the nanocavities. Each of the fluorescence spectra of the respective system shows the spectra of three different experiments ( $N = 3$ ).

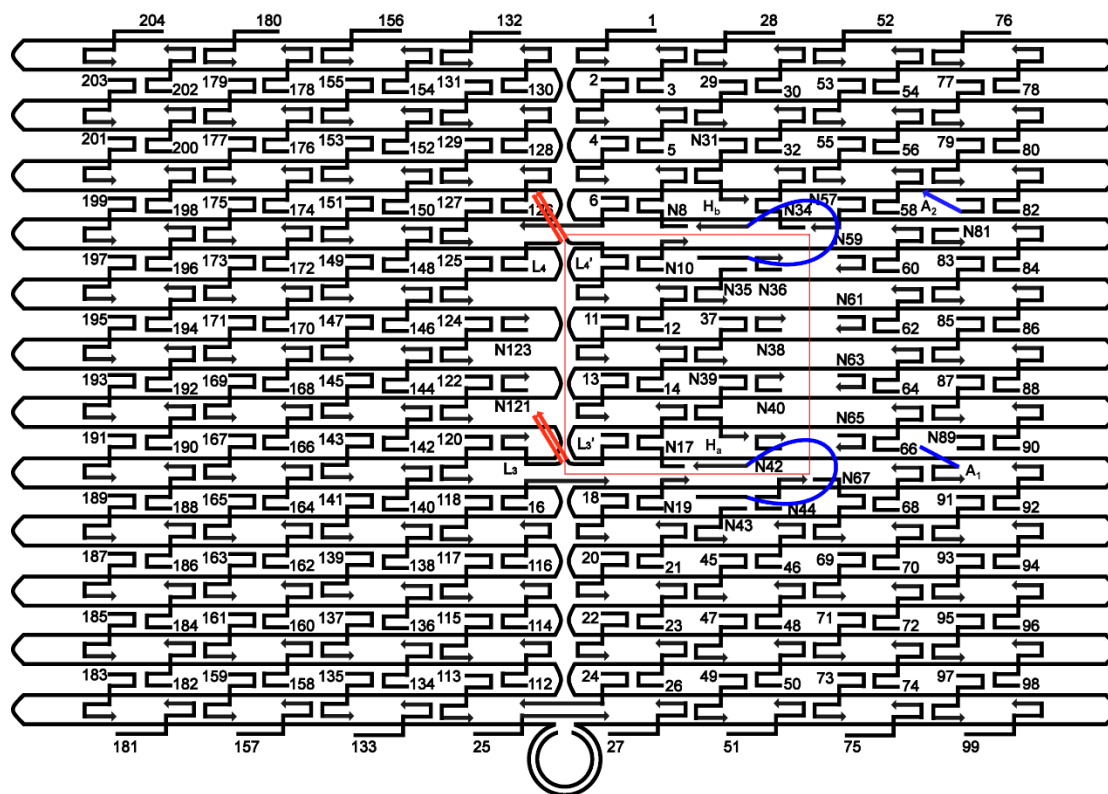

**Supplementary Figure 19. Schematic of the designed origami tile O.** The photochemical switchable locks ( $L_3/L_3'$ ,  $L_4/L_4'$ ) are shown in red double lines, the handles ( $H_a$ ,  $H_b$ ) are blue loops and the anchoring tethers ( $A_1$ ,  $A_2$ ) are short blue lines. The red square shows the area of the designed “window” in the origami tile O.

The left side of the designed “window” is locked to the origami tile scaffold using linker strands ( $L_3/L_3'$ ,  $L_4/L_4'$ , in red color) that extend from the staple strands on the “window” and the origami tile scaffold<sup>1</sup>.  $L_3'$  and  $L_4$  are modified with azobenzene units that response to UV ( $\lambda = 365$  nm) and visible light ( $\lambda > 420$  nm) to unlock or lock the “window”, respectively. The handles (blue loop) and the anchoring footholds are same as that in the origami tile N in Supplementary Fig. 1. The staples on the left and right edges are removed to avoid the aggregation of the origami tiles<sup>1</sup>.

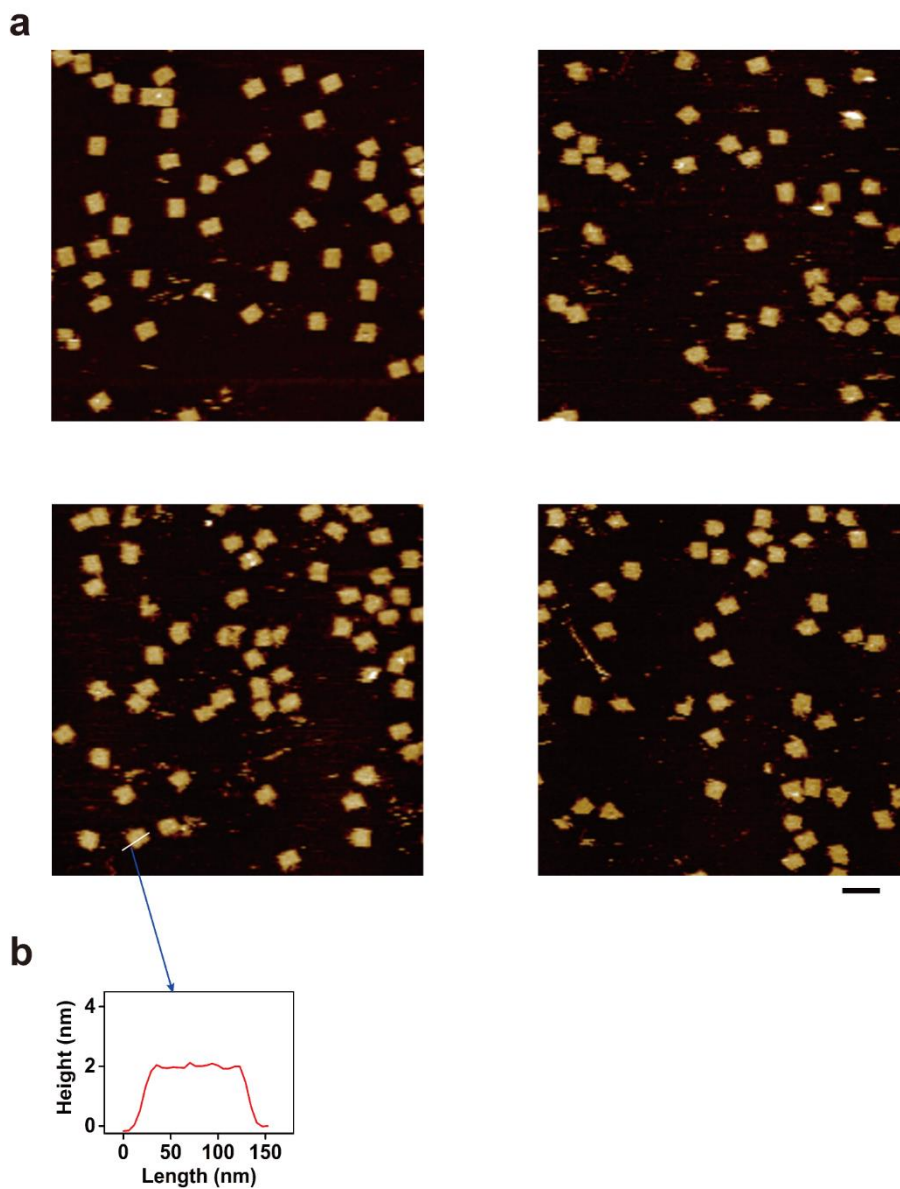

**Supplementary Figure 20. AFM measurements of the locked origami tiles O. a,** Four AFM images of the initial locked origami tiles O before the treatment with UV light irradiation and the helper hairpins H<sub>3</sub>/H<sub>4</sub>. **b,** cross-section analysis of the tile O. Source data are provided as a Source Data file. Scale bar: 200 nm.

**Supplementary Table 10. Statistical analysis of the yields of the unlocked and locked origami tiles O before the treatment with UV light irradiation and the helper hairpins H<sub>3</sub>/H<sub>4</sub>. The analysis is performed on the images shown in Supplementary Fig. 20a.**

| Statistical analysis <sup>a</sup> |           | Unlocked | Locked | Incomplete structure |
|-----------------------------------|-----------|----------|--------|----------------------|
| 1                                 | Count     | 0        | 47     | 1                    |
|                                   | Yield (%) | 0        | 97.9   | 2.1                  |
| 2                                 | Count     | 0        | 37     | 1                    |
|                                   | Yield (%) | 0        | 97.4   | 2.6                  |
| 3                                 | Count     | 0        | 41     | 1                    |
|                                   | Yield (%) | 0        | 97.6   | 2.4                  |
| 4                                 | Count     | 0        | 51     | 2                    |
|                                   | Yield (%) | 0        | 96.2   | 3.8                  |

**a.** The statistical analysis of the locked origami tiles involved the identification of intact origami structures. Imperfect tiles were identified as damaged origami scaffolds.

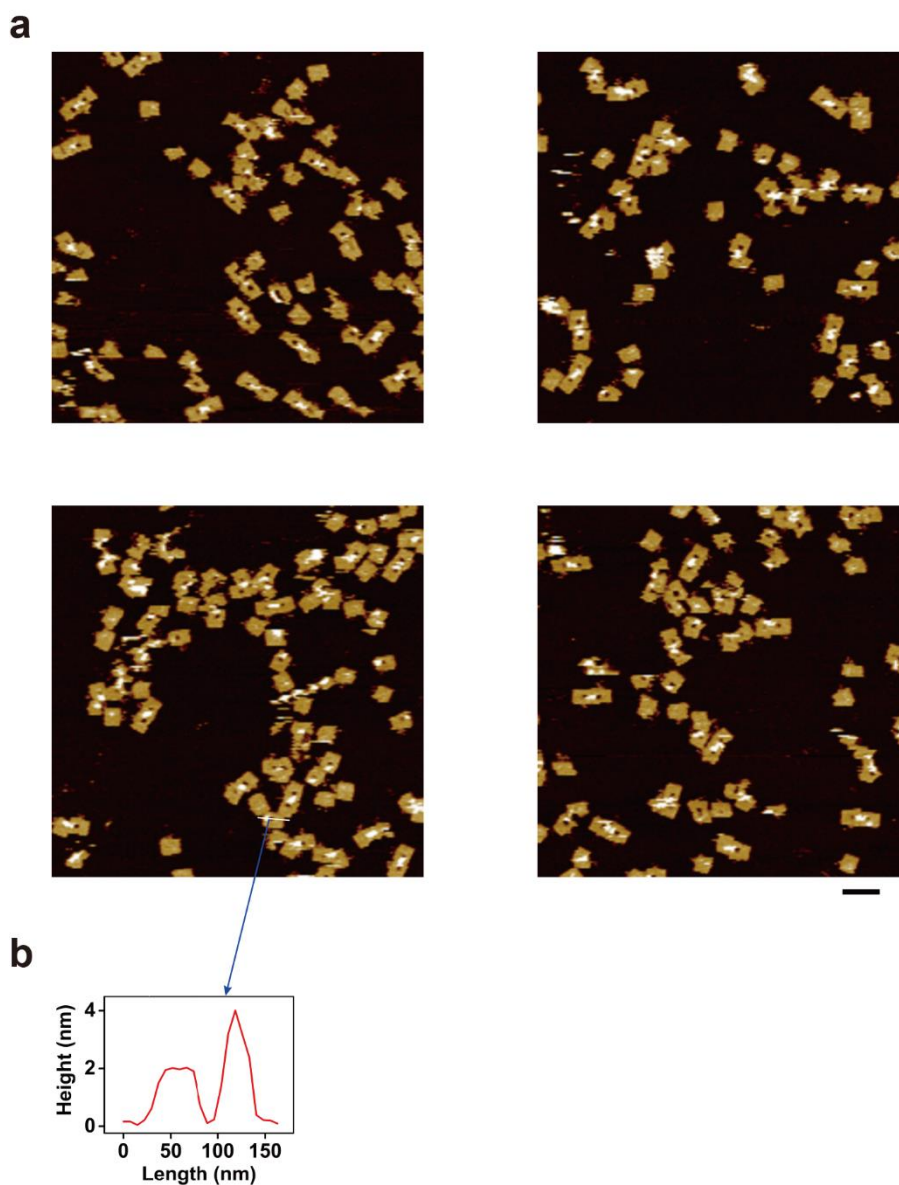

**Supplementary Figure 21. AFM measurements of the unlocked origami tiles O.** **a**, Four AFM images of the unlocked origami tiles O upon the treatment of the tiles O with UV light irradiation ( $\lambda = 365$  nm) and the helper hairpins H<sub>3</sub>/H<sub>4</sub> (first cycle). **b**, cross-section analysis of the tile O confirming the formation of the nanohole. Source data are provided as a Source Data file. Scale bar: 200 nm.

**Supplementary Table 11. Statistical analysis of the yields of the unlocked and locked origami tiles O in the unlocked state (II) after the treatment with UV light irradiation ( $\lambda = 365$  nm) and the helper hairpins H<sub>3</sub>/H<sub>4</sub> (first cycle). The analysis is performed on the images shown in Supplementary Fig. 21a.**

| Statistical analysis <sup>a</sup> |           | Unlocked | Locked | Incomplete structure |
|-----------------------------------|-----------|----------|--------|----------------------|
| 1                                 | Count     | 38       | 6      | 5                    |
|                                   | Yield (%) | 77.6     | 12.2   | 10.2                 |
| 2                                 | Count     | 38       | 13     | 2                    |
|                                   | Yield (%) | 71.7     | 24.5   | 3.8                  |
| 3                                 | Count     | 39       | 10     | 4                    |
|                                   | Yield (%) | 73.6     | 18.9   | 7.5                  |
| 4                                 | Count     | 48       | 14     | 2                    |
|                                   | Yield (%) | 75       | 21.9   | 3.1                  |

**a.** The statistical analysis of the unlocked origami tiles involved the identification of intact origami structures that included open cavities on the tiles. Locked structures were identified as tiles without identified cavity. Imperfect tiles were identified as damaged origami scaffolds.



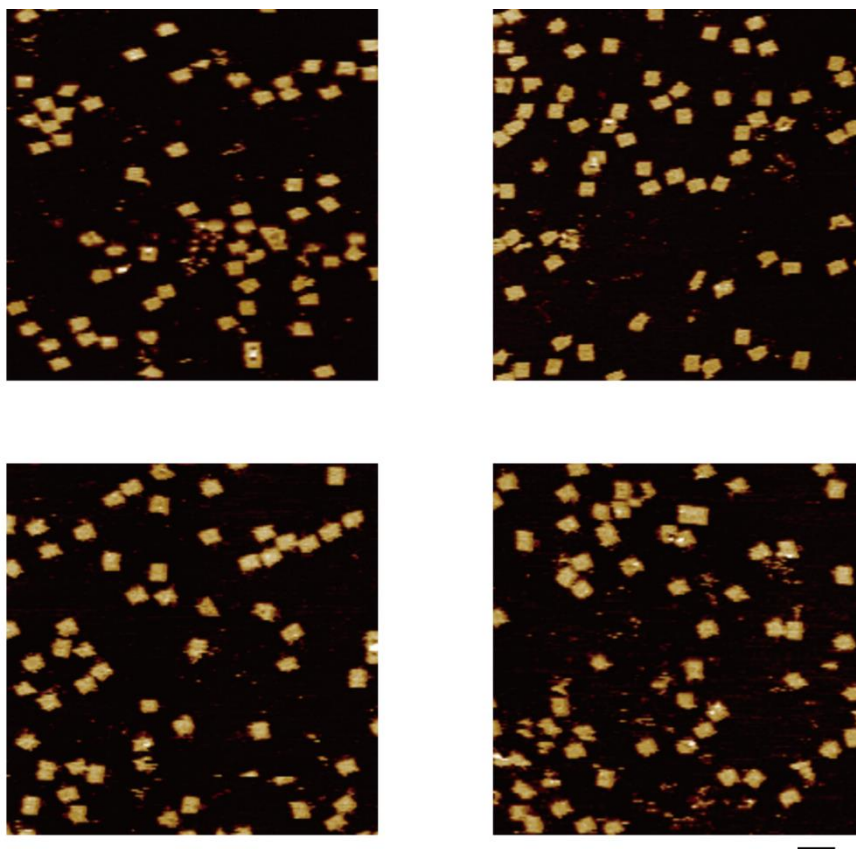

**Supplementary Figure 22. AFM measurements of the regeneration of the locked origami tiles O.** Four AFM images of the regenerated and locked origami tiles O upon the treatment of the unlocked tiles with anti-helper strands ( $H_{3a}/H_{3b}'$  and  $H_{4a}/H_{4b}'$ ) and visible light irradiation ( $\lambda > 420$  nm). Scale bar: 200 nm.

**Supplementary Table 12. Statistical analysis of the yields of the unlocked and locked origami tiles O upon the treatment of the unlocked tiles with anti-helper strands (H<sub>3a</sub>'/H<sub>3b</sub>' and H<sub>4a</sub>'/H<sub>4b</sub>') and visible light irradiation ( $\lambda > 420$  nm). The analysis is performed on the images shown in Supplementary Fig. 22.**

| Statistical analysis <sup>a</sup> |           | Unlocked | Locked | Incomplete structure |
|-----------------------------------|-----------|----------|--------|----------------------|
| 1                                 | Count     | 3        | 46     | 2                    |
|                                   | Yield (%) | 5.9      | 90.2   | 3.9                  |
| 2                                 | Count     | 3        | 52     | 2                    |
|                                   | Yield (%) | 5.3      | 91.2   | 3.5                  |
| 3                                 | Count     | 2        | 42     | 2                    |
|                                   | Yield (%) | 4.3      | 91.3   | 4.3                  |
| 4                                 | Count     | 2        | 37     | 3                    |
|                                   | Yield (%) | 4.8      | 88.1   | 7.1                  |

**a.** The statistical analysis of the unlocked and locked origami tiles involved the identification of intact origami structures. Imperfect tiles were identified as damaged origami scaffolds.

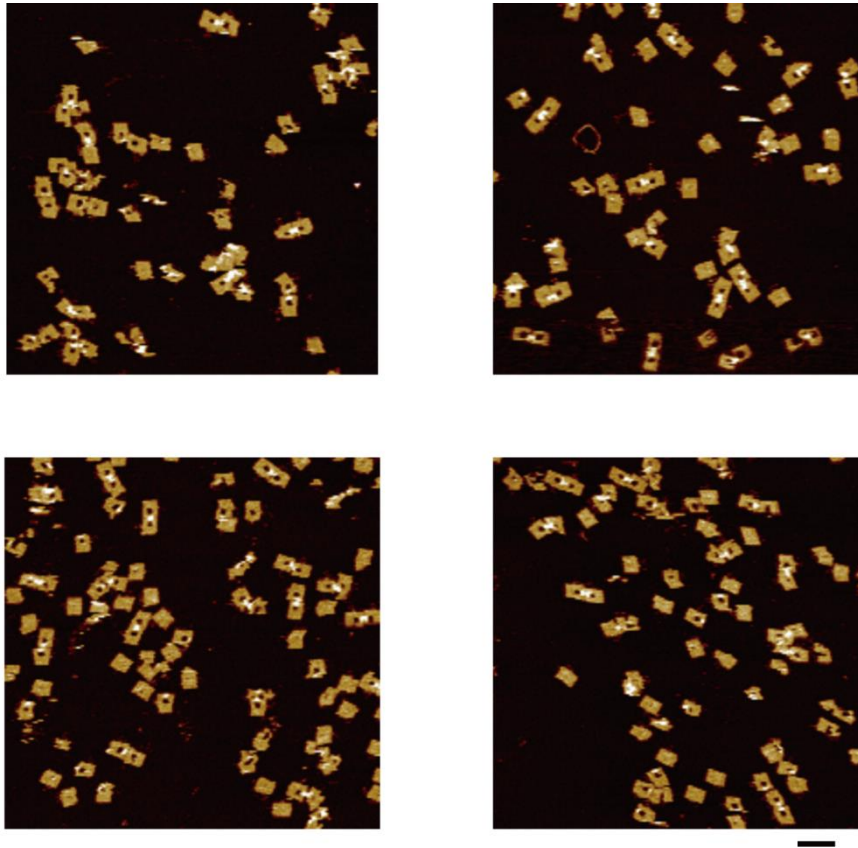

**Supplementary Figure 23. AFM measurements of the unlocked origami tiles O (second cycle).** Four AFM images of the unlocked origami tiles O after the treatment with UV light irradiation ( $\lambda = 365$  nm) and the helper hairpins H<sub>3</sub>/H<sub>4</sub> (second cycle). Scale bar: 200 nm.

**Supplementary Table 13. Statistical analysis of the yields of the unlocked and locked origami tiles O after the treatment with UV light irradiation ( $\lambda = 365$  nm) and the helper hairpins H<sub>3</sub>/H<sub>4</sub> (second cycle). The analysis is performed on the images shown in Supplementary Fig. 23.**

| Statistical analysis <sup>a</sup> |           | Unlocked | Locked | Incomplete structure |
|-----------------------------------|-----------|----------|--------|----------------------|
| 1                                 | Count     | 32       | 10     | 3                    |
|                                   | Yield (%) | 71.1     | 22.2   | 6.7                  |
| 2                                 | Count     | 29       | 6      | 3                    |
|                                   | Yield (%) | 76.3     | 15.8   | 7.9                  |
| 3                                 | Count     | 39       | 8      | 5                    |
|                                   | Yield (%) | 75       | 15.4   | 9.6                  |
| 4                                 | Count     | 40       | 16     | 5                    |
|                                   | Yield (%) | 65.6     | 26.2   | 8.2                  |

**a.** The statistical analysis of the unlocked and locked origami tiles involved the identification of intact origami structures. Imperfect tiles were identified as damaged origami scaffolds.

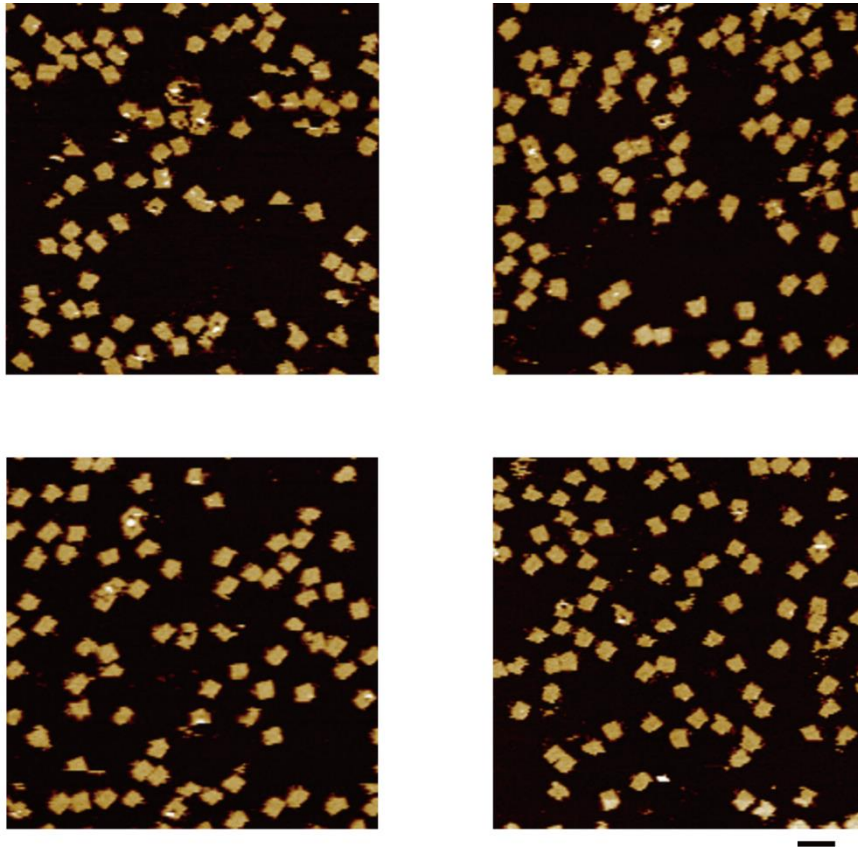

**Supplementary Figure 24. AFM measurements of the locked origami tile O (second cycle).** Four AFM images of the regenerated and locked origami tiles after the treatment of the unlocked tiles with anti-helper strands ( $H_{3a}'/H_{3b}'$  and  $H_{4a}'/H_{4b}'$ ) and visible light irradiation ( $\lambda > 420$  nm) (second cycle). Scale bar: 200 nm.

**Supplementary Table 14. Statistical analysis of the yields of the unlocked and locked origami tiles O after the treatment of the unlocked tiles with anti-helper strands (H<sub>3a</sub>'/H<sub>3b</sub>' and H<sub>4a</sub>'/H<sub>4b</sub>') and visible light irradiation ( $\lambda > 420$  nm) (second cycle). The analysis is performed on the images shown in Supplementary Fig. 24.**

| Statistical analysis <sup>a</sup> |           | Unlocked | Locked | Incomplete structure |
|-----------------------------------|-----------|----------|--------|----------------------|
| 1                                 | Count     | 5        | 59     | 5                    |
|                                   | Yield (%) | 7.2      | 85.5   | 7.2                  |
| 2                                 | Count     | 7        | 58     | 6                    |
|                                   | Yield (%) | 9.9      | 81.7   | 8.5                  |
| 3                                 | Count     | 5        | 46     | 3                    |
|                                   | Yield (%) | 9.3      | 85.2   | 5.6                  |
| 4                                 | Count     | 7        | 58     | 3                    |
|                                   | Yield (%) | 10.3     | 85.3   | 4.4                  |

**a.** The statistical analysis of the unlocked and locked origami tiles involved the identification of intact origami structures. Imperfect tiles were identified as damaged origami scaffolds.

## Control experiments for the light-induced unlocking of the origami tile O

Supplementary Fig. 25 shows the AFM images of origami tiles subjected to the hairpins H<sub>3</sub>/H<sub>4</sub> in the absence of light. No formation of nanoholes is detected implying that the irradiation of the tiles O is essential to generate the nanoholes. Supplementary Fig. 26 shows the AFM images of the origami tiles O subjected to the photoinduced isomerization of the *trans*-azobenzene to *cis*-azobenzene units, leading to the unlocking of the locks, in the absence of the hairpins H<sub>3</sub>/H<sub>4</sub>. Very low yield (< 8%) of the hole-containing origami tiles is observed, despite the cleavage of locks. These results indicate that the H<sub>3</sub>/H<sub>4</sub>-driven mechanical stretching of the “window” domain through the handle units is essential to produce the high-yield nanopore-containing tiles (74%). Indeed, treatment of the light-induced origami mixture shown in Supplementary Fig. 26 with hairpins H<sub>3</sub>/H<sub>4</sub> leads to the stretching of the “window” domains and to the formation of the high-yield nanopore-containing tiles.

Furthermore, the AFM image of the nanohole-containing tiles shown in Fig. 4b(II), text, reveals some dimer structures of the origami tiles. These dimer structures are attributed to inter-origami tiles interaction upon deposition on the mica surface. The nanohole-containing tiles exist, however, as monomers in solution. This was confirmed by electrophoretic measurement shown in Supplementary Fig. 27<sup>2,3</sup>.

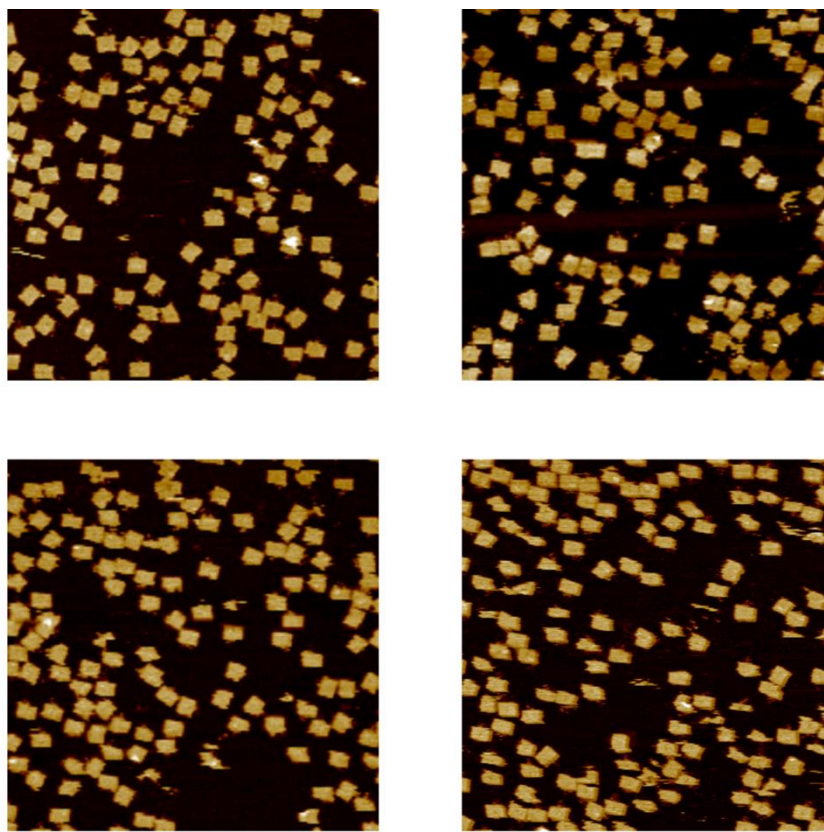

**Supplementary Figure 25. AFM images of the control experiment examining the unlocking of the origami tiles O in the presence of the helper hairpins H<sub>3</sub>/H<sub>4</sub> and in the absence of UV irradiation ( $\lambda = 365$  nm). No tiles with nanoholes are observed, implying that the UV irradiation is essential to unlock the origami tiles to yield the nanoholes. Scale bar: 200 nm.**



**Supplementary Table 15. Statistical analysis of the yields of the unlocked and locked origami tiles O in the presence of the helper hairpins H<sub>3</sub>/H<sub>4</sub> and in the absence of UV irradiation ( $\lambda = 365$  nm). The analysis is performed on the images shown in Supplementary Fig. 25.**

| Statistical analysis <sup>a</sup> |           | Unlocked | Locked | Incomplete structure |
|-----------------------------------|-----------|----------|--------|----------------------|
| 1                                 | Count     | 0        | 93     | 9                    |
|                                   | Yield (%) | 0        | 91.2   | 8.8                  |
| 2                                 | Count     | 0        | 94     | 8                    |
|                                   | Yield (%) | 0        | 92.2   | 7.8                  |
| 3                                 | Count     | 0        | 103    | 8                    |
|                                   | Yield (%) | 0        | 92.8   | 7.2                  |
| 4                                 | Count     | 0        | 97     | 21                   |
|                                   | Yield (%) | 0        | 82.2   | 17.8                 |

**a.** The statistical analysis of the locked origami tiles involved the identification of intact origami structures. Imperfect tiles were identified as damaged origami scaffolds.

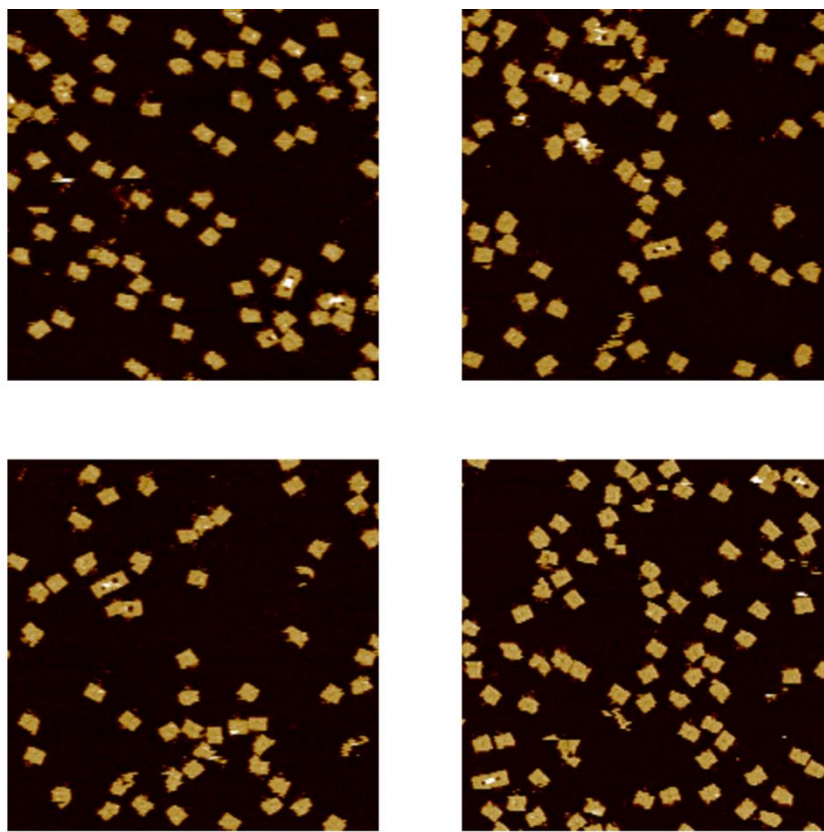

**Supplementary Figure 26. AFM images of the control experiment examining the photo-driven unlocking of the origami tiles O in the absence of the helper hairpins H<sub>3</sub>/H<sub>4</sub>. Only few origami tiles show open nanoholes. The results imply that the unlocked “window” exists in a flexible configuration that retains the nanohole closed, in the absence of the hairpin helper units H<sub>3</sub>/H<sub>4</sub> that stretch the “window” to a rigid configuration by the hairpins/handles/anchor site units. Scale bar: 200 nm.**

**Supplementary Table 16. Statistical analysis of the yields of the unlocked and locked origami tiles O in the presence of UV irradiation ( $\lambda = 365$  nm) and in the absence of the helper hairpins H<sub>3</sub>/H<sub>4</sub>. The analysis is performed on the images shown in Supplementary Fig. 26.**

| Statistical analysis <sup>a</sup> |           | Unlocked | Locked | Incomplete structure |
|-----------------------------------|-----------|----------|--------|----------------------|
| 1                                 | Count     | 5        | 51     | 2                    |
|                                   | Yield (%) | 8.6      | 87.9   | 3.4                  |
| 2                                 | Count     | 5        | 51     | 3                    |
|                                   | Yield (%) | 8.5      | 86.4   | 5.1                  |
| 3                                 | Count     | 3        | 45     | 4                    |
|                                   | Yield (%) | 5.8      | 86.5   | 7.7                  |
| 4                                 | Count     | 4        | 63     | 4                    |
|                                   | Yield (%) | 5.6      | 88.7   | 5.6                  |

**a.** The statistical analysis of the unlocked and locked origami tiles involved the identification of intact origami structures. Imperfect tiles were identified as damaged origami scaffolds.

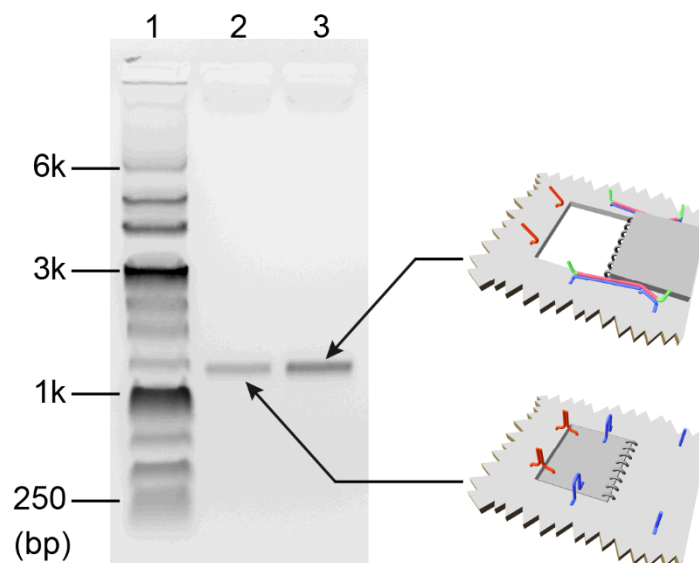

**Supplementary Figure 27. Electrophoresis gel result and bands corresponding to the locked tile and unlocked tile solutions (lane 2 and 3, respectively), indicating that the tiles exist in solutions as single tiles, and the small population of the dimer constitutions observed in the AFM images on the mica originate from the surface adhesion phenomena. Lane 1 is the reference ladder (kilobase) to indicate the relative position of the migration band of the origami tile structures<sup>4</sup>. Source data is provided as a Source Data file.**

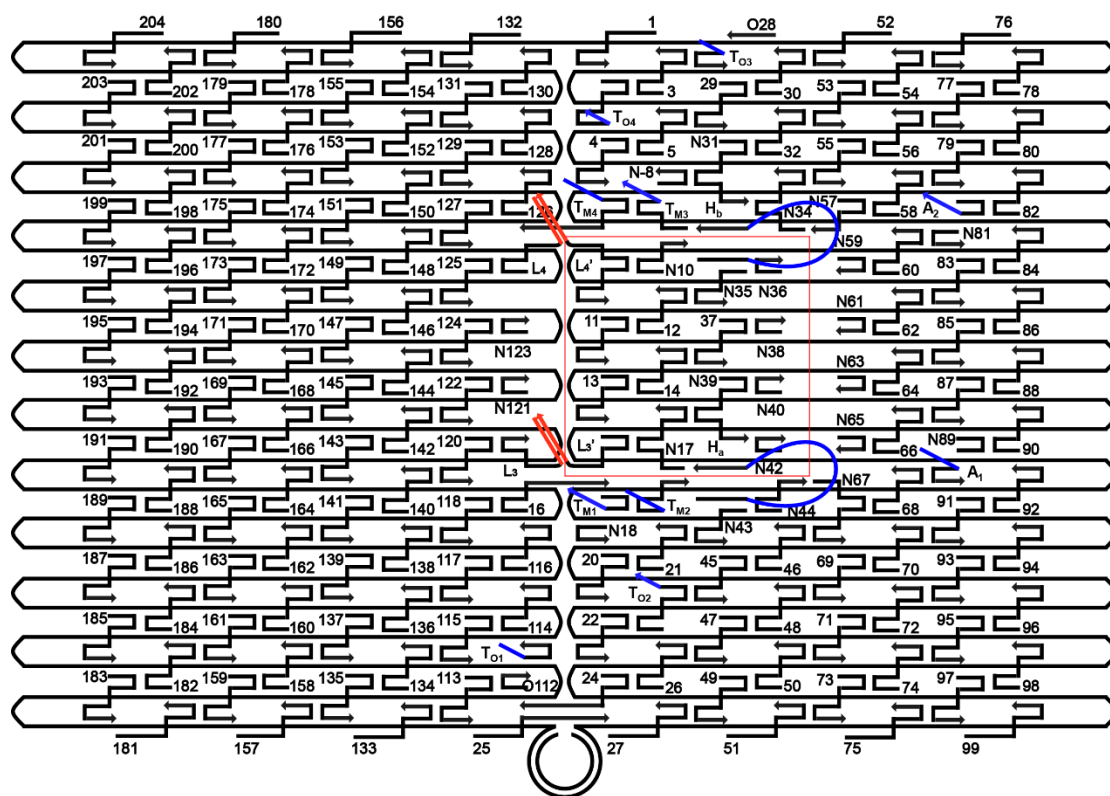

**Supplementary Figure 28. Schematic of the design of the origami tile  $O_r$ .** The tile is functionalized with four pairs of tethers that hybridize with the  $G_{1x}$  and  $G_2$  strands and separate the duplexes of the two strands during the switching process on opposite sides of the tile scaffold. The tile  $O_f$  includes the photochemical unlocking apparatus in tile  $O$ , as shown in Supplementary Fig. 19.

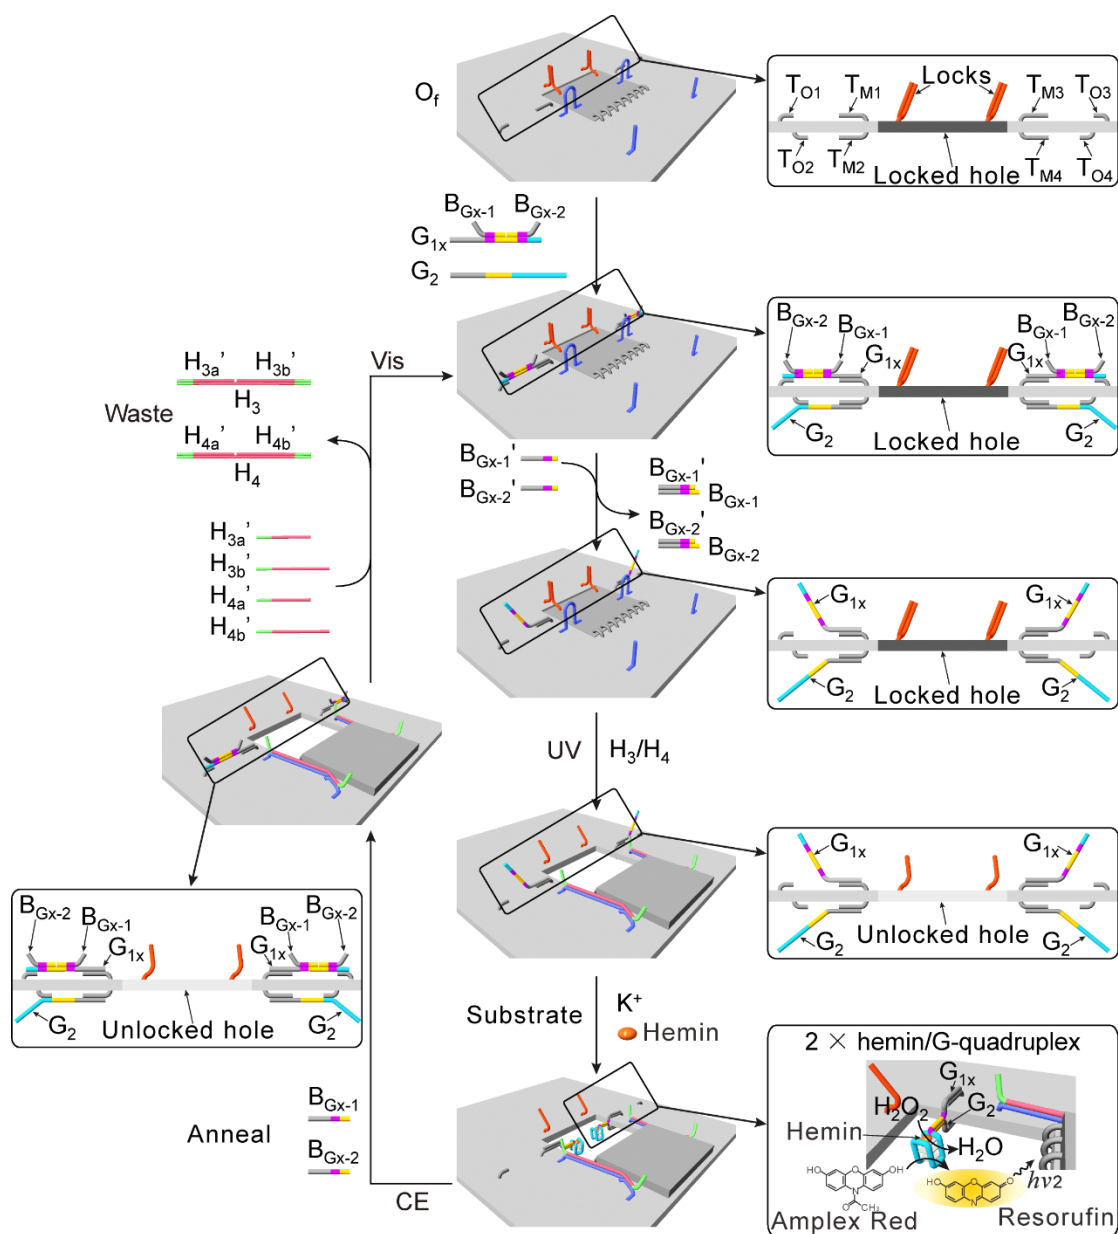

**Supplementary Figure 29. Schematic of engineering of the origami tile  $O_f$  and the photo-switchable catalysis of the hemin/G-quadruplex DNAzyme in the nanocavity.** The tile  $O_f$  includes the photochemically-driven unlocking apparatus (discussed in Fig. 4 and text). Protruding tethers  $T_{M1}/T_{M3}$  and  $T_{M2}/T_{M4}$  are designed on the opposite sides of the origami raft. The duplex  $G_{1x}/B_{Gx-1}/B_{Gx-2}$  and the strand  $G_2$  are hybridized with the tethers  $T_{M1}/T_{M3}$  and  $T_{M2}/T_{M4}$ , respectively. Prior to the photochemical unlocking of the tile,  $G_{1x}/B_{Gx-1}/B_{Gx-2}$  are unblocked by the strand displacement process, using appropriate anti-blockers ( $B_{Gx-1}'/B_{Gx-2}'$ ). The deblocked strand  $G_{1x}$  and  $G_2$  correspond to G-quadruplex subunits. The photochemically induced unlocking of the origami tile  $O_f$ , in the presence of the helper hairpins  $H_3$  and  $H_4$  leads to the formation of the nanohole. In the presence of  $K^+$  ions and hemin, the hemin/G-quadruplex DNAzymes that catalyze the  $H_2O_2$  oxidation of Amplex Red to the fluorescent Resorufin are formed in the confined nanocavity. Treatment of the catalytic system with 18-crown-6-ether(CE) and the blockers  $B_{Gx-1}$  and  $B_{Gx-2}$  separates the G-

quadruplex units and the subsequent photo-isomerization of the *cis*-azobenzene units in the presence of the respective counter helper units ( $H_{3a'}/H_{3b'}/H_{4a'}/H_{4b'}$ ), leads to the closure of the nanohole (cf. Fig. 4 and accompanying discussion in the text). The scheme represents the mechanistic path for the cyclic photo-switching of the activity of the hemin/G-quadruplex in the confined nanocavity associated with the origami tile. The reversible switching of the fluorescence of Resorufin provides the readout signal for the “ON”/“OFF” photochemical switching of the catalytic functions of the system.

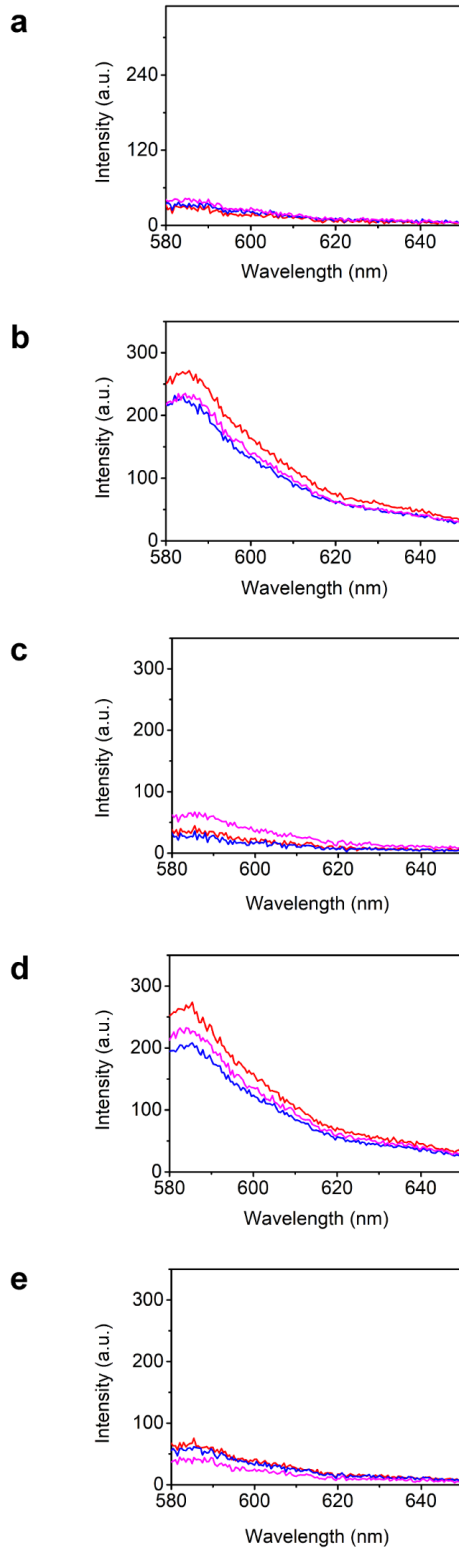

**Supplementary Figure 30. Fluorescence spectra corresponding to the cyclic photo-switching activation of the hemin/G-quadruplex DNAzyme upon the photo-driven unlocking and locking of the nanoholes in the origami  $O_f$ .** **a**, Fluorescence spectra of Resorufin generated by the locked origami  $O_f$ . **b**, Fluorescence spectra of Resorufin generated upon unlocking of the origami tile  $O_f$  with the UV irradiation ( $\lambda = 365$  nm) and the helper hairpins  $H_3/H_4$  (cf. process shown in Supplementary Fig. 29). The



fluorescence spectra of Resorufin show the enhanced intensity over the background signal generated in the confined cavity (cf. first cycle in Fig. 4e). **c**, Fluorescence spectra of Resorufin upon subjecting the unlocked origami to the crown ether (CE), blockers  $B_{Gx-1}/B_{Gx-2}$ , anti-helpers  $H_{3a}'/H_{3b}'/H_{4a}'/H_{4b}'$  and visible light ( $\lambda > 420$  nm) (cf. process shown in Supplementary Fig. 29). No fluorescence changes of Resorufin above the background signal are observed (cf. first cycle in Fig. 4e). **d**, Fluorescence spectra of Resorufin generated upon subjecting the locked origami tile  $O_f$  to the anti-blockers ( $B_{Gx-1}'/B_{Gx-2}'$ ), UV irradiation ( $\lambda = 365$  nm) and helper hairpins  $H_3/H_4$  (cf. process shown in Supplementary Fig. 29). The fluorescence intensities of Resorufin are enhanced as compared to the background signal, consistent with the activation of the hemin/G-quadruplex DNAzyme in the nanocavity (cf. second cycle in Fig. 4e). **e**, Fluorescence spectra of Resorufin upon subjecting the unlocked origami tile  $O_f$  to the CE, blockers ( $B_{Gx-1}/B_{Gx-2}$ ), anti-helpers  $H_{3a}'/H_{3b}'/H_{4a}'/H_{4b}'$  and visible light irradiation ( $\lambda > 420$  nm) (cf. process shown in Supplementary Fig. 29). No fluorescence changes of Resorufin above the background signal are observed (cf. second cycle in Fig. 4e). Each of the fluorescence spectra of the respective systems shows the spectra of three different experiments ( $N = 3$ ).

**Supplementary Table 17. DNA sequences of origami tile N.**

|                   |                                                                                             |
|-------------------|---------------------------------------------------------------------------------------------|
| T <sub>1</sub>    | CATGGTAGGTAGTGCTCATCTTTGGCCGAGACAGTCATTCAA<br>A                                             |
| T <sub>2</sub>    | GCGTTATAGAAAAAGCCTGTTTAGTTTGATGTCATGGACTCTGT<br>CTC                                         |
| T <sub>3</sub>    | CATAACCCGAGGCATAGTAAGAGCTTTGATGTCATGGACTCTGT<br>CTC                                         |
| T <sub>4</sub>    | CATGGTAGGTAGTGCTCATCTTTTTTAAGAAAAGTAATATCTTAC<br>CGAAGCCCTTCCAGAG                           |
| N123              | TTTTAATTGCCCGAAA                                                                            |
| N121              | TTTCATTTGGTCAATA                                                                            |
| N8                | TTCAACCGATTGAGGGTAAAGGTGAATTATCAATCACCGG                                                    |
| N10               | GCAATAGCGCAGATAGCCGA                                                                        |
| N17               | GGAATCATAATTACTACAAATTCTTACCAGTAATCCCATC                                                    |
| N19               | TAGAATCCCTGAGAAGAGTC                                                                        |
| N31               | GCCACCACTCTTTTCATAATCAAACCGTCACCGACTTGAG                                                    |
| N35               | ATAAGAGCAAGAAACAACAGCCAT                                                                    |
| N39               | GGTATTAAGAACAAGA AAAATAATTAAGCCAACGCTCAA                                                    |
| N43               | CGTCGCTATTAATTAACGGATTCTG                                                                   |
| N34               | GGTTTACCAGCGCCAACCATTTGGGAATTAGATTATTAGC                                                    |
| N36               | GCCCAATACCGAGGAA                                                                            |
| N38               | TATTTTGCTCCCAATC                                                                            |
| N40               | TAAGTCCTACCAAGTA                                                                            |
| N42               | AGGCGTTACAGTAGGG                                                                            |
| N44               | CTGTAAATCATAGGTCTGAGAGAC                                                                    |
| N57               | AATCACCAAATAGAAAATTCATAT                                                                    |
| N59               | ATACCCAAGATAACCC                                                                            |
| N61               | TTTTGTTTAAGCCTTA                                                                            |
| N63               | CAAGCAAGACGCGCCT                                                                            |
| N65               | CATATTTAGAAATACC                                                                            |
| N67               | TACCTTTTTAACCTCCATATGTGAGTGAATAAACAATAATC                                                   |
| N81               | GAATAAGTAAGACTCC                                                                            |
| N89               | AGAGGCATAATTTTCAT                                                                           |
| H <sub>a</sub>    | AATAGTGAATTTATCAAATTTTAAATTCAACTTTTTTACCATTTTA<br>ATTTTAAACCTTTTCCTTTTAATAAGAATAAACACC      |
| H <sub>b</sub>    | ACAAAGTTACCAGAAGGATTTTCATCCATTCATTTTCATTACTTT<br>AATTCCTTAATTCTTTTCTTAGACAAAAGGGCGACA       |
| A <sub>1</sub>    | TTGGAAAAGGTTTTTCTTCTGACTATAACTA                                                             |
| A <sub>2</sub>    | CCGGAAACACACCACGTTTTTGAATGGATGTT                                                            |
| A <sub>1-C5</sub> | Cy5-TTGGAAAAGGTTTTTCTTCTGACTATAACTA                                                         |
| H <sub>a-C3</sub> | AATAGTGAATTTATCAAATTTTAAATTCAACTTTTTTACCATTTTA<br>ATTTTAAACCTTTTCCTTTT[Cy3]AATAAGAATAAACACC |

**Supplementary Table 18. DNA sequences of origami tile M.**

|                |                                                                               |
|----------------|-------------------------------------------------------------------------------|
| T <sub>5</sub> | GAGTCGATCTTCAGTGACTGTTTGGCCGGAGACAGTCATTCAA<br>AA                             |
| T <sub>6</sub> | GCGTTATAGAAAAAGCCTGTTTAGTTTCTGGATTGTCTACTCCT<br>CG                            |
| T <sub>7</sub> | CATAACCCGAGGCATAGTAAGAGCTTTCTGGATTGTCTACTCCT<br>TCG                           |
| T <sub>8</sub> | GAGTCGATCTTCAGTGACTGTTTTTTAAGAAAAGTAATATCTTA<br>CCGAAGCCCTTCCAGAG             |
| M160           | ACTGCCCCGCCGAGCTCATGAATCCTTTTGGATTCATCAAGTGCT<br>TTTTAGCACTTGGAATTCGTTATTACGC |
| M162           | CAGCTGGCGGACGACGATGAATCCTTTTGGATTCATCAAGTGCT<br>TTTTAGCACTTGACAGTATCGTAGCCAG  |
| M163           | GTTTGAGGGAAAGGGGATGAATCCTTTTGGATTCATCAAGTGCT<br>TTTTAGCACTTGATGTGCTAGAGGATC   |
| M165           | AGAAAAGCAACATTAATGAATCCTTTTGGATTCATCAAGTGCT<br>TTTTAGCACTTGATGTGAGCATCTGCCA   |

**Supplementary Table 19. DNA sequences of origami tile N<sub>f</sub>.**

|                 |                                                            |
|-----------------|------------------------------------------------------------|
| T <sub>N1</sub> | TTAAGACGTTGAAAACCTTTTGATGGTCAGGTTGTCCTG                    |
| T <sub>N2</sub> | GTCAGTGGTAGAGGTGTCTTTTTAGAAATCCCTGAGAAGAGTC                |
| T <sub>N3</sub> | TTCAACCGATTGAGGGTAAAGGTGTTTTGATGGTCAGGTTGTCC<br>TG         |
| T <sub>N4</sub> | GTCAGTGGTAGAGGTGTCTTTTTTATTCATAGGGAAGGTAAATAT<br>TCATTCAGT |
| N18             | ATAGCGATAACAGTAC                                           |
| N-8             | AATTATCAATCACCGG                                           |

**Supplementary Table 20. DNA sequences of origami tile M<sub>f</sub>.**

|                 |                                                            |
|-----------------|------------------------------------------------------------|
| T <sub>M1</sub> | TTAAGACGTTGAAAACCTTTGAGCTGTATCACACGTAC                     |
| T <sub>M2</sub> | GTAGTCCAACCTGTCTACTTTTTAGAAATCCCTGAGAAGAGTC                |
| T <sub>M3</sub> | TTCAACCGATTGAGGGTAAAGGTGTTTTGAGCTGTATCACACGT<br>AC         |
| T <sub>M4</sub> | GTAGTCCAACCTGTCTACTTTTTTATTCATAGGGAAGGTAAATAT<br>TCATTCAGT |

**Supplementary Table 21. DNA sequences of origami tile O**

|                  |                                                                                       |
|------------------|---------------------------------------------------------------------------------------|
| L <sub>3</sub>   | GTAGACAGTGTTTGGCCGGAGACAGTCATTCAAAA                                                   |
| L <sub>3</sub> ' | GCGTTATAGAAAAAGCCTGTTTAGTTTCA <i>Azo</i> CT <i>Azo</i> GT <i>Azo</i> CT <i>Azo</i> AC |
| L <sub>4</sub>   | CATAACCCGAGGCATAGTAAGAGCTTTGA <i>Azo</i> GT <i>Azo</i> CA <i>Azo</i> TG <i>Azo</i> TG |
| L <sub>4</sub> ' | CACATGACTCTTTTTTAAGAAAAGTAATATCTTACCGAAGCCCTTCCAGAG                                   |

**Supplementary Table 22. DNA sequences of origami tile O<sub>r</sub>.**

|                 |                                             |
|-----------------|---------------------------------------------|
| T <sub>O1</sub> | GTTACCCATTTCTGTTTGAAGCCGGAA                 |
| T <sub>O2</sub> | GGATTTAGCGTATTAATCCTTTGTTTTTCAGGTTTACCCAGTC |
| T <sub>O3</sub> | GTTACCCATTTTCATTTTCCTATTATT                 |
| T <sub>O4</sub> | AATGCCCCGTAACAGTGCCCGTATCTCCCTCATTTACCCAGTC |
| O112            | CCGAAATCCGAAAATC                            |
| O28             | CTCAGAGCCACCACC                             |

**Supplementary Table 23. Other DNA sequences for the origami tiles.**

|                                |                                                                                                       |
|--------------------------------|-------------------------------------------------------------------------------------------------------|
| L <sub>1</sub>                 | GAGACAGAGTCCATGACATCGACTAGACGTTGAAGGATACCGATGAGCACTACCTACCATG                                         |
| L <sub>2</sub>                 | CGAAGGAGTAGACAATCCAGCTCACTATrAAGGAAGAGATGAGACAGTCACTGAAGATCGACTC                                      |
| DNAzy<br>me(Zn <sup>2+</sup> ) | GGTATCTAGTTGAGCTGTCTAGTC                                                                              |
| DNAzy<br>me(Pb <sup>2+</sup> ) | TCTCATCTCTGAAGTAGCGCCGCCGTATAGTGAG                                                                    |
| H <sub>1</sub>                 | TTAACCTTTTCCTTTAAAAAGGAAAAGGTTAAAATTTAAAATGGTAAAAAAGTTGAATTTAAAA                                      |
| H <sub>2</sub>                 | AAGAAAAGAATTAAGGAATTAAGTAATGAAAATGAATGGATGAAAAAATTCATCCATTCATT                                        |
| E <sub>his</sub>               | GACACCTCTACCAGTGACTTTTTTTCTGCTAACGGGGCTGTGCGGCTAGGAAGTAATACTCTAGTTTTTACAGCCCCGTTAGCAGCAGGTCTCTGCATCAC |
| K <sub>his</sub>               | GAATGTGATGCAGAGACCTGCTGCTAACGGGGCTGTTTTTCAAGACAACCTGACCATC                                            |
| B <sub>his-1</sub>             | CATCCGTCGCAGCAGGTCTC                                                                                  |
| B <sub>his-2</sub>             | TGCATCACATTCAGCCCCTT                                                                                  |

|                      |                                                                                                  |
|----------------------|--------------------------------------------------------------------------------------------------|
| B <sub>his-1</sub> ' | CCTGCTGCGACGGATG                                                                                 |
| B <sub>his-2</sub> ' | AAGGGGCTGAATGTGA                                                                                 |
| S                    | FAM-CATTCTTCACTAGAGTATrAGGAGCAGAAAGAAGAATG-BHQ1                                                  |
| G <sub>1</sub>       | TGGGTGATGGTCGTCTACAGACTGCCAGATTTTGTACGTGTGATACAGCTC                                              |
| G <sub>2</sub>       | GTAGACAGGTTGGACTACTTTTGCAGTCTGTAGACGACTGGGTAGGGCGGG                                              |
| B <sub>G-1</sub>     | TACCCTTCTCTGGCAGTCTG                                                                             |
| B <sub>G-2</sub>     | TAGACGACCATCAGTGCTCC                                                                             |
| B <sub>G-1</sub> '   | CTGCCAGAGAAGGGTA                                                                                 |
| B <sub>G-2</sub> '   | GGAGCACTGATGGTTCG                                                                                |
| H <sub>3</sub>       | CAGCACACCTAGTTAACCTTTTTCCTTTAAAAAGGAAAAGGTAA<br>AAATTTAAATGGTAAAAAAGTTGAATTTAAAACGAGAGGTCA<br>TG |
| H <sub>4</sub>       | CAGCACACCTAGAAAAGGAAAAGGTAAATTTAAATGGTAA<br>AAAAGTTGAATTTAAAATTTAAATTTCAACTTTTTCGAGAGGTCA<br>ATG |
| H <sub>3a</sub> '    | CATGACCTCTCGTTTTTAAATTCAACTTTTTTACCATTTTA                                                        |
| H <sub>3b</sub> '    | ATTTTAACCTTTTTCCTTTTAAAGGAAAAGGTAACTAGGTGT<br>GCTG                                               |
| H <sub>4a</sub> '    | ACCATTTTAATTTTAAGGTTTTTCCTTTTCTAGGTGTGCTG                                                        |
| H <sub>4b</sub> '    | CATGACCTCTCGAAAAGTTGAATTTAAATTTTAAATTCAACTT<br>TTTT                                              |
| G <sub>1x</sub>      | TGGGTCACTGATGGTCGTCTACAGACTGCCAGAGAAGTTTTG<br>TACGTGTGATACAGCTC                                  |
| B <sub>Gx-1</sub>    | GAGCTGTACCCTTCTCTGGCAGTCTG                                                                       |
| B <sub>Gx-2</sub>    | TAGACGACCATCAGTGCTCCTGACTC                                                                       |
| B <sub>Gx-1</sub> '  | CTGCCAGAGAAGGGTACAGCTC                                                                           |
| B <sub>Gx-2</sub> '  | GAGTCAGGAGCACTGATGGTTCG                                                                          |
| H <sub>1-c</sub>     | GAAGAAAAAACCTTTTTCCTTTAAAAAGGAAAAGGTAAATTT<br>AAAATGGTAAAAAAGTTGAATTTAAAA                        |

**Supplementary Table 24. Staple sequences for the rectangle origami.**

|   |                                   |
|---|-----------------------------------|
| 1 | CAAGCCCAATAGGAAC CCATGTACAAACAGTT |
| 2 | AATGCCCGTAACAGT GCCCGTATCTCCCTCA  |
| 3 | TGCCTTGACTGCCTAT TTCGGAACAGGGATAG |
| 4 | GAGCCGCCCCACCACC GGAACCGCGACGGAAA |
| 5 | AACCAGAGACCCTCAG AACCGCCAGGGGTCAG |
| 6 | TTATTCATAGGGAAGG TAAATATTCATTCAGT |
| 7 | CATAACCCGAGGCATA GTAAGAGCTTTTTAAG |
| 8 | ATTGAGGGTAAAGGTG AATTATCAATCACCGG |

|    |                                    |
|----|------------------------------------|
| 9  | AAAAGTAATATCTTAC CGAAGCCCTTCCAGAG  |
| 10 | GCAATAGCGCAGATAG CCGAACAATTCAACCG  |
| 11 | CCTAATTTACGCTAAC GAGCGTCTAATCAATA  |
| 12 | TCTTACCAGCCAGTTA CAAAATAAATGAAATA  |
| 13 | ATCGGCTGCGAGCATG TAGAAACCTATCATAT  |
| 14 | CTAATTTATCTTTCCT TATCATTTCATCCTGAA |
| 15 | GCGTTATAGAAAAGC CTGTTTAGAAGGCCGG   |
| 16 | GCTCATTTTCGCATTA AATTTTTGAGCTTAGA  |
| 17 | AATTACTACAAATTCT TACCAGTAATCCCATC  |
| 18 | TTAAGACGTTGAAAAC ATAGCGATAACAGTAC  |
| 19 | TAGAATCCCTGAGAAG AGTCAATAGGAATCAT  |
| 20 | CTTTTACACAGATGAA TATACAGTAAACAATT  |
| 21 | TTAACGTTTCGGGAGA AACATAATTTCCCT    |
| 22 | CGACAATAAGTATTA GACTTTACAATACCGA   |
| 23 | GGATTTAGCGTATTAA ATCCTTTGTTTTCAGG  |
| 24 | ACGAACCAAACATCG CCATTAATGGTGGTT    |
| 25 | GAACGTGGCGAGAAAG GAAGGGAACAACTAT   |
| 26 | TAGCCCTACCAGCAGA AGATAAAAACATTTGA  |
| 27 | CGGCCTTGCTGGTAAT ATCCAGAACGAACTGA  |
| 28 | CTCAGAGCCACCACC TCATTTTCCTATTATT   |
| 29 | CTGAAACAGGTAATAA GTTTTAACCCCTCAGA  |
| 30 | AGTGTAAGTAAAGTA TTAAGAGGCCGCCACC   |
| 31 | GCCACCACTCTTTTCA TAATCAAACCGTCACC  |
| 32 | GTTTGCCACCTCAGAG CCGCCACCGATACAGG  |
| 33 | GACTTGAGAGACAAAA GGGCGACAAGTTACCA  |
| 34 | AGCGCCAACCATTTGG GAATTAGATTATTAGC  |
| 35 | GAAGGAAAATAAGAGC AAGAAACAACAGCCAT  |
| 36 | GCCAATACCGAGGAA ACGCAATAGGTTTACC   |
| 37 | ATTATTTAACCCAGCT ACAATTTTCAAGAACG  |
| 38 | TATTTTGCTCCCAATC CAAATAAGTGAGTTAA  |
| 39 | GGTATTAAGAACAAGA AAAATAATTAAGCCA   |
| 40 | TAAGTCCTACCAAGTA CCGCACTCTTAGTTGC  |
| 41 | ACGCTCAAATAAGAA TAAACACCGTGAATTT   |
| 42 | AGGCGTTACAGTAGGG CTTAATTGACAATAGA  |
| 43 | ATCAAATCGTCGCTA TTAATTAACGGATTCG   |
| 44 | CTGTAAATCATAGGTC TGAGAGACGATAAATA  |
| 45 | CCTGATTGAAAGAAAT TGCGTAGACCCGAACG  |
| 46 | ACAGAAATCTTTGAAT ACCAAGTTCCTTGCTT  |
| 47 | TTATTAATGCCGTCAA TAGATAATCAGAGGTG  |
| 48 | AGATTAGATTTAAAAG TTTGAGTACACGTAAA  |
| 49 | AGGCGGTCATTAGTCT TTAATGCGCAATATTA  |
| 50 | GAATGGCTAGTATTAA CACCGCCTCAACTAAT  |
| 51 | CCGCCAGCCATTGCAA CAGGAAAAATATTTTT  |

|    |                                    |
|----|------------------------------------|
| 52 | CCCTCAGAACCGCCAC CCTCAGAACTGAGACT  |
| 53 | CCTCAAGAATACATGG CTTTGTAGAAACCAC   |
| 54 | TAAGCGTCGAAGGATT AGGATTAGTACCGCCA  |
| 55 | CACCAGAGTTCGGTCA TAGCCCCCGCCAGCAA  |
| 56 | TCGGCATTCCGCCGCC AGCATTGACGTTCCAG  |
| 57 | AATCACCAAATAGAAA ATTCATATATAACGGA  |
| 58 | TCACAATCGTAGCACC ATTACCATCGTTTTCA  |
| 59 | ATACCCAAGATAACCC ACAAGAATAAACGATT  |
| 60 | ATCAGAGAAAGAACTG GCATGATTTTATTTTG  |
| 61 | TTTTGTTTAAGCCTTA AATCAAGAATCGAGAA  |
| 62 | AGGTTTTGAACGTCAA AAATGAAAGCGCTAAT  |
| 63 | CAAGCAAGACGCGCCT GTTTATCAAGAATCGC  |
| 64 | AATGCAGACCGTTTTT ATTTTCATCTTGCGGG  |
| 65 | CATATTTAGAAATACC GACCGTGTTACCTTTT  |
| 66 | AATGGTTTACAACGCC AACATGTAGTTCAGCT  |
| 67 | TAACCTCCATATGTGA GTGAATAAACAAAATC  |
| 68 | AAATCAATGGCTTAGG TTGGGTTACTAAATTT  |
| 69 | GCGCAGAGATATCAAA ATTATTTGACATTATC  |
| 70 | AACCTACCGCGAATTA TTCATTTCCAGTACAT  |
| 71 | ATTTTGCGTCTTTAGG AGCACTAAGCAACAGT  |
| 72 | CTAAAATAGAACAAAG AAACCACCAGGGTTAG  |
| 73 | GCCACGCTATACGTGG CACAGACAACGCTCAT  |
| 74 | GCGTAAGAGAGAGCCA GCAGCAAAAAGGTTAT  |
| 75 | GGAATAACCTACATTT TGACGCTCACCTGAAA  |
| 76 | TATCACCGTACTCAGG AGGTTTAGCGGGGTTT  |
| 77 | TGCTCAGTCAGTCTCT GAATTTACCAGGAGGT  |
| 78 | GGAAGCGACCAGGCG GATAAGTGAATAGGTG   |
| 79 | TGAGGCAGGCGTCAGA CTGTAGCGTAGCAAGG  |
| 80 | TGCCTTTAGTCAGACG ATTGGCCTGCCAGAAT  |
| 81 | CCGGAAACACACCACG GAATAAGTAAGACTCC  |
| 82 | ACGCAAAGGTCACCAA TGAAACCAATCAAGTT  |
| 83 | TTATTACGGTCAGAGG GTAATTGAATAGCAGC  |
| 84 | TGAACAAACAGTATGT TAGCAAATAAAAGAA   |
| 85 | CTTTACAGTTAGCGAA CCTCCCGACGTAGGAA  |
| 86 | GAGGCGTTAGAGAATA ACATAAAAGAACACCC  |
| 87 | TCATTACCCGACAATA AACAACATATTTAGGC  |
| 88 | CCAGACGAGCGCCCAA TAGCAAGCAAGAACGC  |
| 89 | AGAGGCATAATTTTCAT CTTCTGACTATAACTA |
| 90 | TTTTAGTTTTTCGAGC CAGTAATAAATTCTGT  |
| 91 | TATGTAAACCTTTTTT AATGGAAAAATTACCT  |
| 92 | TTGAATTATGCTGATG CAAATCCACAAATATA  |
| 93 | GAGCAAAAACCTTCTGA ATAATGGAAGAAGGAG |
| 94 | TGGATTATGAAGATGA TGAAACAAAATTTTCAT |

|     |                                              |
|-----|----------------------------------------------|
| 95  | CGGAATTATTGAAAGG AATTGAGGTGAAAAAT            |
| 96  | ATCAACAGTCATCATA TTCCTGATTGATTGTT            |
| 97  | CTAAAGCAAGATAGAA CCCTTCTGAATCGTCT            |
| 98  | GCCAACAGTCACCTTG CTGAACCTGTTGGCAA            |
| 99  | GAAATGGATTATTTAC ATTGGCAGACATTCTG            |
| 100 | TTTT TATAAGTA TAGCCCGGCCGTCGAGAGGGTGA        |
| 101 | TTTT ATAAATCC TCATTAAATGATATTCACAAACAA       |
| 102 | TTTT AATCAGTA GCGACAGATCGATAGCAGCACCGT       |
| 103 | TTTT TAAAGGTG GCAACATAGTAGAAAATACATACA       |
| 104 | TTTT GACGGGAG AATTAACACTACAGGGAAGCGCATT      |
| 105 | TTTT GCTTATCC GGTATTCTAAATCAGATATAGAAG       |
| 106 | TTTT CGACAAAA GGTAAGTAGAGAATATAAAGTAC        |
| 107 | TTTT CGCGAGAA AACTTTTATCGCAAGACAAAGAA        |
| 108 | TTTT ATTAATTA CATTAAACACATCAAGAAAACAAA       |
| 109 | TTTT TTCATCAA TATAATCCTATCAGATGATGGCAA       |
| 110 | TTTT AATCAATA TCTGGTCACAAATATCAAACCCTC       |
| 111 | TTTT ACCAGTAA TAAAAGGGATTCACCA GTCACACG TTTT |
| 112 | CCGAAATCCGAAAATC CTGTTTGAAGCCGGAA            |
| 113 | CCAGCAGGGGCAAAT CCCTTATAAAGCCGGC             |
| 114 | GCATAAAGTTCCACAC AACATACGAAGCGCCA            |
| 115 | GCTCACAATGTAAAGC CTGGGGTGGGTTTGCC            |
| 116 | TTCGCCATTGCCGGAA ACCAGGCATTAAATCA            |
| 117 | GCTTCTGGTCAGGCTG CGCAACTGTGTTATCC            |
| 118 | GTAAAATTTTAACCA ATAGGAACCCGGCACC             |
| 119 | AGACAGTCATTCAAAA GGGTGAGAAGCTATAT            |
| 120 | AGGTAAAGAAATCACC ATCAATATAATATTTT            |
| 121 | TTTCATTTGGTCAATA ACCTGTTTATATCGCG            |
| 122 | TCGCAAATGGGGCGCG AGCTGAAATAATGTGT            |
| 123 | TTTTAATTGCCCGAAA GACTTCAAAACACTAT            |
| 124 | AAGAGGAACGAGCTTC AAAGCGAAGATACATT            |
| 125 | GGAATTACTCGTTTAC CAGACGACAAAAGATT            |
| 126 | GAATAAGGACGTAACA AAGCTGCTCTAAAACA            |
| 127 | CCAAATCACTTGCCCT GACGAGAACGCCAAAA            |
| 128 | CTCATCTTGAGGCAAA AGAATACAGTGAATTT            |
| 129 | AAACGAAATGACCCCC AGCGATTATTCATTAC            |
| 130 | CTTAAACATCAGCTTG CTTTCGAGCGTAACAC            |
| 131 | TCGGTTTAGCTTGATA CCGATAGTCCAACCTA            |
| 132 | TGAGTTTCGTCACCAG TACAACTTAATTGTA             |
| 133 | CCCCGATTTAGAGCTT GACGGGGAAATCAAAA            |
| 134 | GAATAGCCGCAAGCGG TCCACGCTCCTAATGA            |
| 135 | GAGTTGCACGAGATAG GGTTGAGTAAGGGAGC            |
| 136 | GTGAGCTAGTTTCCTG TGTGAAATTTGGGAAG            |
| 137 | TCATAGCTACTCACAT TAATTGCGCCCTGAGA            |



|     |                                    |
|-----|------------------------------------|
| 138 | GGCGATCGCACTCCAG CCAGCTTTGCCATCAA  |
| 139 | GAAGATCGGTGCGGGC CTCTTCGCAATCATGG  |
| 140 | AAATAATTTTAAATTG TAAACGTTGATATTCA  |
| 141 | GCAAATATCGCGTCTG GCCTTCCTGGCCTCAG  |
| 142 | ACCGTTCTAAATGCAA TGCCTGAGAGGTGGCA  |
| 143 | TATATTTTAGCTGATA AATTAATGTTGTATAA  |
| 144 | TCAATTCCTTTTAGTTT GACCATTACCAGACCG |
| 145 | CGAGTAGAACTAATAG TAGTAGCAAACCCTCA  |
| 146 | GAAGCAAAAAAGCGGA TTGCATCAGATAAAAA  |
| 147 | TCAGAAGCCTCCAACA GGTCAGGATCTGCGAA  |
| 148 | CCAAAATATAATGCAG ATACATAAACACCAGA  |
| 149 | CATTCAACGCGAGAGG CTTTTGCATATTATAG  |
| 150 | ACGAGTAGTGACAAGA ACCGGATATACCAAGC  |
| 151 | AGTAATCTTAAATTGG GCTTGAGAGAATACCA  |
| 152 | GCGAAACATGCCACTA CGAAGGCATGCGCCGA  |
| 153 | ATACGTAAAAGTACAA CGGAGATTCATCAAG   |
| 154 | CAATGACACTCCAAAA GGAGCCTTACAACGCC  |
| 155 | AAAAAAGGACAACCAT CGCCCACGCGGGTAAA  |
| 156 | TGTAGCATTCCACAGA CAGCCCTCATCTCCAA  |
| 157 | GTAAAGCACTAAATCG GAACCCTAGTTGTTCC  |
| 158 | AGTTTGGAGCCCTTCA CCGCCTGGTTGCGCTC  |
| 159 | AGCTGATTACAAGAGT CCACTATTGAGGTGCC  |
| 160 | ACTGCCCGCCGAGCTC GAATTCGTTATTACGC  |
| 161 | CCCGGGTACTTTCCAG TCGGGAAACGGGCAAC  |
| 162 | CAGCTGGCGGACGACG ACAGTATCGTAGCCAG  |
| 163 | GTTTGAGGGAAAGGGG GATGTGCTAGAGGATC  |
| 164 | CTTTCATCCCCAAAAA CAGGAAGACCGGAGAG  |
| 165 | AGAAAAGCAACATTAA ATGTGAGCATCTGCCA  |
| 166 | GGTAGCTAGGATAAAA ATTTTTAGTTAACATC  |
| 167 | CAACGCAATTTTTGAG AGATCTACTGATAATC  |
| 168 | CAATAAATACAGTTGA TTCCAATTTAGAGAG   |
| 169 | TCCATATACATACAGG CAAGGCAACTTTATTT  |
| 170 | TACCTTTAAGGTCTTT ACCCTGACAAAGAAGT  |
| 171 | CAAAAATCATTGCTCC TTTTGATAAGTTTCAT  |
| 172 | TTTGCCAGATCAGTTG AGATTTAGTGGTTTAA  |
| 173 | AAAGATTCAGGGGGTA ATAGTAAACCATAAAT  |
| 174 | TTTCAACTATAGGCTG GCTGACCTTGATCAT   |
| 175 | CCAGGCGCTTAATCAT TGTGAATTACAGGTAG  |
| 176 | CGCCTGATGGAAGTTT CCATTAACATAACCG   |
| 177 | TTTCATGAAAATTGTG TCGAAATCTGTACAGA  |
| 178 | ATATATTCTTTTTTCA CGTTGAAAATAGTTAG  |
| 179 | AATAATAAGGTCGCTG AGGCTTGCAAAGACTT  |
| 180 | CGTAACGATCTAAAGT TTTGTCGTGAATTGCG  |

|       |                                              |
|-------|----------------------------------------------|
| 181   | ACCCAAATCAAGTTTT TTGGGGTCAAAGAACG            |
| 182   | TGGACTCCCTTTTCAC CAGTGAGACCTGTCGT            |
| 183   | TGGTTTTTAACGTCAA AGGGCGAAGAACCATC            |
| 184   | GCCAGCTGCCTGCAGG TCGACTCTGCAAGGCG            |
| 185   | CTTGCATGCATTAATG AATCGGCCCGCCAGGG            |
| 186   | ATTAAGTTCGCATCGT AACCGTGCAGTAACA             |
| 187   | TAGATGGGGGGTAACG CCAGGGTTGTGCCAAG            |
| 188   | ACCCGTCGTCATATGT ACCCCGGTAAAGGCTA            |
| 189   | CATGTCAAGATTCTCC GTGGGAACCGTTGGTG            |
| 190   | TCAGGTCACTTTTGCG GGAGAAGCAGAATTAG            |
| 191   | CTGTAATATTGCCTGA GAGTCTGGAAAAC TAG           |
| 192   | CAAAATTAAGTACGG TGTCTGGAAGAGGTCA             |
| 193   | TGCAACTAAGCAATAA AGCCTCAGTTATGACC            |
| 194   | TTTTTGCGCAGAAAAC GAGAATGAATGTTTAG            |
| 195   | AAACAGTTGATGGCTT AGAGCTTATTTAAATA            |
| 196   | ACTGGATAACGGAACA ACATTATTACCTTATG            |
| 197   | ACGAAGTAGCGTCCAA TACTGCGGAATGCTTT            |
| 198   | CGATTTTAGAGGACAG ATGAACGGCGCGACCT            |
| 199   | CTTTGAAAAGAAGCTGG CTCATTATTTAATAAA           |
| 200   | GCTCCATGAGAGGCTT TGAGGACTAGGGAGTT            |
| 201   | ACGGCTACTTACTTAG CCGGAACGCTGACCAA            |
| 202   | AAAGGCCGAAAGGAAC AACTAAAGCTTTCCAG            |
| 203   | GAGAATAGCTTTTTCG GGATCGTCGGGTAGCA            |
| 204   | ACGTTAGTAAATGAAT TTTCTGTAAGCGGAGT            |
| 205   | TTTT CGATGGCC CACTACGTAAACCGTC TATCAGGG      |
| 206   | TTTT CGGTTTGC GTATTGGGAACGCGCG GGGAGAGG      |
| 207   | TTTT TGTA AAC GACGGCCATTCCCAGT CACGACGT      |
| 208   | TTTT GTAATGGG ATAGGTCAAACGGCG GATTGACC       |
| 209   | TTTT GATGAACG GTAATCGTAGCAAACA AGAGAATC      |
| 210   | TTTT GGTTGTAC CAAAACAAGCATAAA GCTAAATC       |
| 211   | TTTT CTGTAGCT CAACATGTATTGCTGA ATATAATG      |
| 212   | TTTT CATTGAAT CCCCTCAAATCGTCA TAAATATT       |
| 213   | TTTT GGAAGAAA AATCTACGACCAGTCA GGACGTTG      |
| 214   | TTTT TCATAAGG GAACCGAAAGGCGCAG ACGGTCAA      |
| 215   | TTTT GACAGCAT CGGAACGAACCCTCAG CAGCGAAA      |
| 216   | TTTT AACTTTCA ACAGTTTCTGGGATTT TGCTAAAC TTTT |
| Loop1 | AACATCACTTGCCTGAGTAGAAGAACT                  |
| Loop2 | TGTAGCAATACTTCTTTGATTAGTAAT                  |
| Loop3 | AGTCTGTCCATCACGCAAATTAACCGT                  |
| Loop4 | ATAATCAGTGAGGCCACCGAGTAAAAG                  |
| Loop5 | ACGCCAGAATCCTGAGAAGTGTTTTT                   |
| Loop6 | TTAAAGGGATTTTAGACAGGAACGGT                   |
| Loop7 | AGAGCGGGAGCTAAACAGGAGGCCGA                   |

|        |                            |
|--------|----------------------------|
| Loop8  | TATAACGTGCTTTCCTCGTTAGAATC |
| Loop9  | GTACTATGGTTGCTTTGACGAGCACG |
| Loop10 | GCGCTTAATGCGCCGCTACAGGGCGC |

## II. Supplementary References

1. Rothemund, P. W. K. Folding DNA to create nanoscale shapes and patterns. *Nature* **440**, 297–302 (2006).
2. Gerling, T., Wagenbauer, K. F., Neuner, A. M. & Dietz, H. Dynamic DNA devices and assemblies formed by shape-complementary, non–base pairing 3D components. *Science* **347**, 1446–1452 (2015).
3. Wagenbauer, K. F., Sigl, C. & Dietz, H. Gigadalton-scale shape-programmable DNA assemblies. *Nature* **552**, 78–83 (2017).
4. Bellot, G., McClintock, M. A., Lin, C. & Shih, W. M. Recovery of intact DNA nanostructures after agarose gel-based separation. *Nat. Methods*. **8**, 192–194 (2011).
